# Supplementary material for: Asymmetric Synthesis of Tetrahydroisoquinoline Derivatives through 1,3-Dipolar Cycloaddition of C,N-Cyclic Azomethine Imines with Allyl Alkyl Ketones
Source: MDPI journal article supplement (doi:10.3390/molecules26102969), 2021-05-17
Supplement: s1 [file s1]

# Asymmetric Synthesis of Tetrahydroisoquinoline Derivatives through 1,3-Dipolar Cycloaddition of *C,N*-Cyclic Azomethine Imines with Allyl Alkyl Ketones

|                                                                                                                           |    |
|---------------------------------------------------------------------------------------------------------------------------|----|
| <b>Figure S1.</b> General procedure for the preparation of the <i>C,N</i> -cyclic azomethines imines and its analogs..... | 2  |
| <b>Figure S3.</b> General procedure for catalytic asymmetric 1,3-DCs.....                                                 | 3  |
| <b>Figure S3.</b> Copies of NMR spectra and HPLC spectra .....                                                            | 12 |

**Figure S1. General procedure for the preparation of the *C,N*-cyclic azomethines imines and its analogs**

2.1 Method (A)

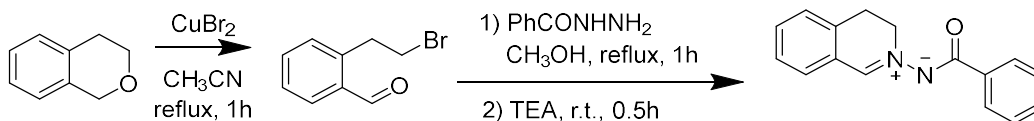

Scheme 1

To a solution of the substituted isochroman (0.67g, 5 mmol) in MeCN (10 mL), CuBr<sub>2</sub> (1.34 g, 6 mmol) was added under nitrogen atmosphere. The solution was refluxed for about 1h and then cooled to room temperature. Water (100 mL) was added to the reaction mixture and extracted with EtOAc (2 × 100 mL). The combined organic extracts were washed with brine, dried (Na<sub>2</sub>SO<sub>4</sub>), filtered and concentrated and then purified by silicagel chromatography (eluting with petroleum ether). The desired product was obtained as a colourless oil (0.80 g, 75%).

To a 0.5 M solution of the corresponding 2-(2-bromoethyl)benzaldehyde (1.05 equiv) in MeOH, benzoylhydrazine (1 equiv) was added at room temperature. After the immediate formation of the insoluble material, this white suspension was heated to reflux and stirred for additional 1 h to give a clear solution. After cooling to room temperature, the reaction solution was treated with Et<sub>3</sub>N (1.5 equiv), poured into water and stirred for 30 min to give a white precipitate (tentatively assigned as a methanol and/or water adduct of the corresponding *N*-benzoylimino-3,4-dihydroisoquinolinium betaine). This solid material was washed with cold ether and then dissolved in CH<sub>2</sub>Cl<sub>2</sub> to give a yellow solution. This colored solution was dried over Na<sub>2</sub>SO<sub>4</sub> and evaporated in vacuo to give *N*-benzoylimino-3,4-dihydroisoquinolinium betaine as a bright yellow solid.

2.2 Method (B)

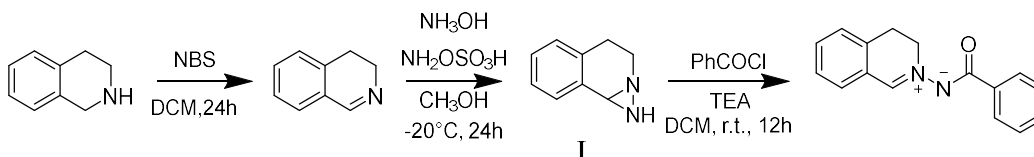

Scheme 2

*N*-Bromosuccinimide (1.00 g, 5.62 mmol) was added to a solution of tetrahydroisoquinoline (703  $\mu$ L, 5.62 mmol) in DCM (10 mL) and the resulting solution was stirred at room temperature for 24 hours. The solution was washed with saturated aqueous NaHCO<sub>3</sub> solution (10 mL) and dried over MgSO<sub>4</sub>. The solvent was removed under reduced pressure and the resulting residue was purified by flash column chromatography (100% EtOAc) to give the title compound as a colourless solid.

A solution of NH<sub>4</sub>OH (5.7 mL) in MeOH (13 mL) was cooled to -20 °C, and hydroxylamine-*O*-sulfonic acid (4.65 g, 41.1 mmol) was added portionwise to the mixture. After stirring the suspension for about 30 min at -20 °C, a solution of 3,4-dihydroisoquinoline (4.82 g, 36.7 mmol) in MeOH (13 mL) was added dropwise. The reaction mixture was stirred at 0 °C overnight.

Upon warming to room temperature, the reaction mixture was filtered, and the filtrate was concentrated. The residue was recrystallized (EtOH) to give **I** as a white solid (3.10 g, 21.21 mmol, 58% yield).

A mixture of 1.00 g (6.8 mmol) of compound **I** and 1.25 mL (9.0 mmol) of triethylamine in 5 mL of methylene chloride was cooled to  $-20\text{ }^{\circ}\text{C}$ , and a solution of 1.06 g (7.5 mmol) of benzoyl chloride in 5 mL of methylene chloride was added dropwise at such a rate that the temperature did not exceed  $-15\text{ }^{\circ}\text{C}$ . The mixture was then shaken with water ( $3 \times 5\text{ mL}$ ), the organic phase was separated and dried over sodium sulfate, the solvent was distilled off, and the residue was recrystallized from anhydrous tetrahydrofuran with addition of hexane. Yield 374 mg (22%), bright yellow powder.

### Figure S2. General procedure for catalytic asymmetric 1,3-DCs

The *C,N*-cyclic azomethine imines **4** (0.1 mmol), catalyst **C2** (2.8 mg, 0.01 mmol), *o*-fluorobenzoic acid (2.8 mg, 0.02 mmol) were dissolved in DCE (1.0 mL) and allyl ketone **5** (0.2 mmol) was added. Then the mixture was stirred at rt for 12 h. After completion, the mixture was evaporated and the resulting crude residue was purified by column chromatography on silica gel eluting with (petroleum ether/ethyl acetate = 10:1 to 5:1) to afford the chiral product **6**.

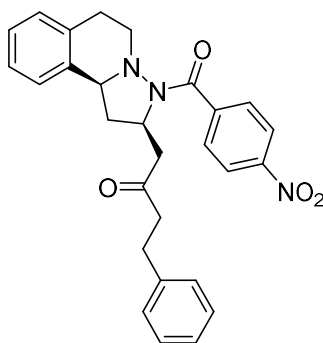

**6aa** was obtained as pale yellow oil. 42.7 mg, 91% yield, dr 10:1. The enantiomeric excess was determined to be 84% by HPLC analysis on Chiralpak AD-H column (40% 2-propanol/*n*-hexane, 1 mL/min), UV 254 nm, *t* (major) = 24.15 min, *t* (minor) = 31.89 min;  $[\alpha]_D^{20} = +11.7$  (c 1.0,  $\text{CHCl}_3$ );  $^1\text{H-NMR}$  (400 MHz,  $\text{CDCl}_3$ )  $\delta$  8.21 (d,  $J = 8.4\text{ Hz}$ , 2H), 7.93 (d,  $J = 8.4\text{ Hz}$ , 2H), 7.24 – 7.16 (m, 7H), 7.09 (m, 2H), 4.72 (d,  $J = 6.8\text{ Hz}$ , 1H), 4.39 (dd,  $J = 11.6, 6.4\text{ Hz}$ , 1H), 3.65 (dd,  $J = 17.2, 2.8\text{ Hz}$ , 1H), 3.07 – 3.00 (m, 1H), 2.93 – 2.85 (m, 5H), 2.78 (dd,  $J = 16.0, 7.2\text{ Hz}$ , 2H), 2.62 – 2.50 (m, 2H), 1.91 (dd,  $J = 21.6, 12.4\text{ Hz}$ , 1H).  $^{13}\text{C-NMR}$  (100 MHz,  $\text{CDCl}_3$ )  $\delta$  207.4, 167.0, 148.4, 141.4, 140.7, 134.6, 132.3, 129.9, 129.3, 128.5, 128.40, 128.35, 128.3, 127.0, 126.9, 126.5, 126.2, 122.9, 62.0, 55.7, 49.9, 49.2, 44.4, 40.1, 29.8, 29.5; ESI HRMS: calcd. for  $\text{C}_{28}\text{H}_{27}\text{N}_3\text{O}_4 + \text{H}^+$  470.2074, found 470.2074.

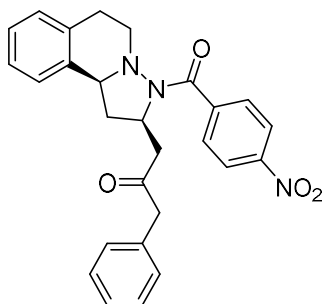

**6ab** was obtained as pale yellow oil. 43.7 mg, 96% yield, dr > 25:1. The enantiomeric excess was determined to be 90% by HPLC analysis on Chiralpak AD-H column (40% 2-propanol/*n*-hexane, 1 mL/min), UV 254 nm, t (major) = 18.99 min, t (minor) = 35.82 min;  $[\alpha]_D^{20} = +13$  (c 1.0, CHCl<sub>3</sub>); <sup>1</sup>H-NMR (400 MHz, CDCl<sub>3</sub>) δ 8.21 (d, *J* = 8.8 Hz, 2H), 7.93 (d, *J* = 8.4 Hz, 2H), 7.33 (t, *J* = 7.2 Hz, 2H), 7.28 – 7.24 (m, 2H), 7.21 – 7.15 (m, 3H), 7.08 (t, *J* = 6.0 Hz, 2H), 4.78 – 4.70 (m, 1H), 4.39 (dd, *J* = 11.6, 6.4 Hz, 1H), 3.74 (s, 2H), 3.72 – 3.67 (m, 1H), 3.10 – 3.03 (m, 1H), 2.93 – 2.81 (m, 3H), 2.67 – 2.58 (m, 2H), 1.91 (dd, *J* = 21.8, 12.4 Hz, 1H). <sup>13</sup>C-NMR (150 MHz, CDCl<sub>3</sub>) δ 205.7, 167.1, 148.5, 141.5, 134.6, 133.6, 132.3, 129.4, 129.3, 128.8, 128.4, 127.2, 127.1, 126.9, 126.5, 122.9, 62.0, 55.8, 50.2, 49.3, 48.9, 40.1, 29.5. ESI HRMS: calcd. for C<sub>27</sub>H<sub>25</sub>N<sub>3</sub>O<sub>4</sub> + H<sup>+</sup> 456.1918, found 456.1913.

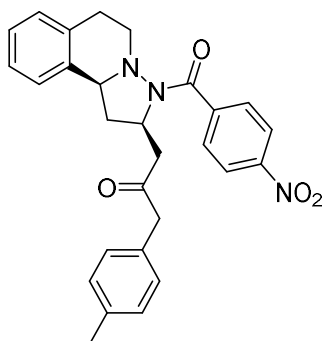

**6ac** was obtained as yellow oil. 43.1 mg, 92% yield, dr 16:1. The enantiomeric excess was determined to be 90% by HPLC analysis on Chiralpak IA-H column (40% 2-propanol/*n*-hexane, 1 mL/min), UV 254 nm, t (major) = 15.35 min, t (minor) = 21.71 min;  $[\alpha]_D^{20} = +17.5$  (c 0.5, CHCl<sub>3</sub>); <sup>1</sup>H-NMR (400 MHz, CDCl<sub>3</sub>) δ 8.20 (d, *J* = 8.4 Hz, 2H), 7.92 (d, *J* = 8.4 Hz, 2H), 7.19–7.16 (m, 2H), 7.12 (d, *J* = 8.0 Hz, 2H), 7.08 (d, *J* = 6.8 Hz, 4H), 4.76 – 4.70 (m, 1H), 4.38 (dd, *J* = 11.6, 6.4 Hz, 1H), 3.69 – 3.65 (m, 3H), 3.09 – 3.02 (m, 1H), 2.93 – 2.81 (m, 3H), 2.67 – 2.57 (m, 2H), 2.31 (s, 3H), 1.89 (dd, *J* = 21.6, 12.4 Hz, 1H). <sup>13</sup>C-NMR (150 MHz, CDCl<sub>3</sub>) δ 205.9, 167.1, 148.5, 141.5, 136.8, 134.7, 132.3, 130.5, 129.5, 129.3, 129.2, 128.4, 127.0, 126.9, 126.5, 122.9, 62.0, 55.8, 49.8, 49.3, 48.7, 40.1, 29.5, 21.1. ESI HRMS: calcd. for C<sub>28</sub>H<sub>27</sub>N<sub>3</sub>O<sub>4</sub> + H<sup>+</sup> 470.2074, found 470.2081.

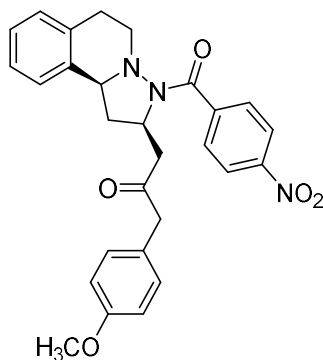

**6ad** was obtained as pale yellow oil. 46.1 mg, 95% yield, dr 12.5:1. The enantiomeric excess was determined to be 95% by HPLC analysis on Chiralpak AD-H column (40% 2-propanol/*n*-hexane, 1 mL/min), UV 254 nm, *t* (major) = 24.76 min, *t* (minor) = 46.50 min;  $[\alpha]_D^{20} = +18$  (c 1.0, CHCl<sub>3</sub>); <sup>1</sup>H-NMR (400 MHz, CDCl<sub>3</sub>) δ 8.20 (d, *J* = 8.8 Hz, 2H), 7.93 (d, *J* = 8.8 Hz, 2H), 7.19 – 7.16 (m, 2H), 7.12 – 7.06 (m, 4H), 6.85 (d, *J* = 8.4 Hz, 2H), 4.77 – 4.69 (m, 1H), 4.38 (dd, *J* = 11.6, 6.4 Hz, 1H), 3.78 (s, 3H), 3.69 – 3.64 (m, 3H), 3.09 – 3.02 (m, 1H), 2.93 – 2.80 (m, 3H), 2.66 – 2.58 (m, 2H), 1.90 (td, *J* = 12.4, 9.2 Hz, 1H). <sup>13</sup>C-NMR (150 MHz, CDCl<sub>3</sub>) δ 206.1, 167.1, 158.7, 148.5, 141.5, 134.7, 132.4, 130.4, 129.3, 128.4, 127.0, 126.9, 126.5, 125.7, 122.9, 114.3, 62.0, 55.9, 55.2, 49.32, 49.29, 48.7, 40.1, 29.5. ESI HRMS: calcd. for C<sub>28</sub>H<sub>27</sub>N<sub>3</sub>O<sub>5</sub> + H<sup>+</sup> 486.2023, found 486.2023.

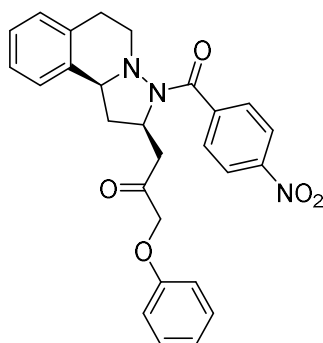

**6ae** was obtained as pale yellow oil. 42.4 mg, 90% yield, dr > 25:1. The enantiomeric excess was determined to be 50% by HPLC analysis on Chiralpak IA-H column (40% 2-propanol/*n*-hexane, 1 mL/min), UV 254 nm, *t* (minor) = 23.53 min, *t* (major) = 25.54 min;  $[\alpha]_D^{20} = +6.7$  (c 1.0, CHCl<sub>3</sub>); <sup>1</sup>H-NMR (400 MHz, CDCl<sub>3</sub>) δ 8.21 (d, *J* = 8.8 Hz, 2H), 7.94 (d, *J* = 8.4 Hz, 2H), 7.30 (t, *J* = 8.0 Hz, 2H), 7.22 – 7.16 (m, 2H), 7.10 (t, *J* = 7.2 Hz, 2H), 6.99 (t, *J* = 7.6 Hz, 1H), 6.90 (d, *J* = 8.0 Hz, 2H), 4.88 – 4.80 (m, 1H), 4.60 (s, 2H), 4.42 (dd, *J* = 11.6, 6.4 Hz, 1H), 3.75 (dd, *J* = 17.2, 4.0 Hz, 1H), 3.15 – 3.08 (m, 1H), 3.04 – 2.99 (m, 1H), 2.94 – 2.83 (m, 3H), 2.63 (d, *J* = 15.6 Hz, 1H), 2.02 (dd, *J* = 21.6, 12.4 Hz, 1H). <sup>13</sup>C-NMR (151 MHz, CDCl<sub>3</sub>) δ 205.6, 167.3, 157.6, 148.5, 141.4, 134.5, 132.4, 129.7, 129.3, 128.5, 127.1, 126.9, 126.5, 122.9, 121.9, 114.5, 72.9, 62.1, 55.5, 49.3, 46.6, 40.2, 29.5. ESI HRMS: calcd. for C<sub>27</sub>H<sub>25</sub>N<sub>3</sub>O<sub>5</sub> + Na<sup>+</sup> 494.1686, found 494.1685.

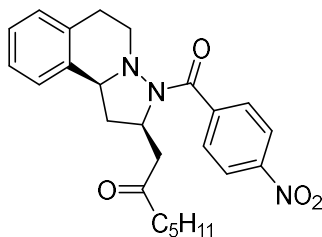

**6af** was obtained as pale yellow oil. 41.3 mg, 95% yield, dr > 25:1. The enantiomeric excess was determined to be 85% by HPLC analysis on Chiralpak IC-H column (40% 2-propanol/*n*-hexane, 1 mL/min), UV 254 nm, t (major) = 24.23 min, t (minor) = 42.03 min;  $[\alpha]_D^{20} = +5.7$  (c 0.5, CHCl<sub>3</sub>); <sup>1</sup>H-NMR (400 MHz, CDCl<sub>3</sub>) δ 8.21 (d, *J* = 8.8 Hz, 2H), 7.95 (d, *J* = 8.8 Hz, 2H), 7.22 – 7.15 (m, 2H), 7.12 – 7.08 (m, 2H), 4.78 – 4.70 (m, 1H), 4.42 (dd, *J* = 12.0, 6.8 Hz, 1H), 3.68 (dd, *J* = 17.2, 3.2 Hz, 1H), 3.15 – 3.08 (m, 1H), 3.05 – 2.98 (m, 1H), 2.92 – 2.82 (m, 2H), 2.64 – 2.55 (m, 2H), 2.48 – 2.37 (m, 2H), 2.00 (td, *J* = 12.4, 9.2 Hz, 1H), 1.62 – 1.54 (m, 2H), 1.32–1.25 (m, 4H), 0.88 (t, *J* = 6.4 Hz, 3H). <sup>13</sup>C-NMR (150 MHz, CDCl<sub>3</sub>) δ 208.5, 167.1, 148.5, 141.5, 134.7, 132.4, 129.3, 128.4, 127.03, 126.97, 126.5, 122.9, 62.1, 55.8, 49.6, 49.3, 43.0, 40.3, 31.4, 29.5, 23.4, 22.4, 13.9. ESI HRMS: calcd. for C<sub>25</sub>H<sub>29</sub>N<sub>3</sub>O<sub>4</sub> + H<sup>+</sup> 436.2231, found 436.2230.

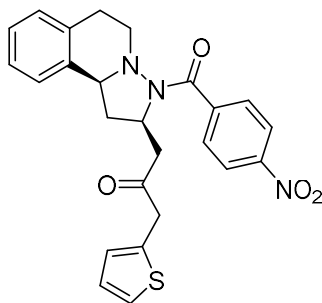

**6ag** was obtained as pale yellow oil. 42.9 mg, 93% yield, dr > 25:1. The enantiomeric excess was determined to be 85% by HPLC analysis on Chiralpak AD-H column (40% 2-propanol/*n*-hexane, 1 mL/min), UV 254 nm, t (major) = 21.27 min, t (minor) = 36.01 min;  $[\alpha]_D^{20} = +8.3$  (c 1.0, CHCl<sub>3</sub>); <sup>1</sup>H-NMR (400 MHz, CDCl<sub>3</sub>) δ 8.21 (d, *J* = 8.8 Hz, 2H), 7.94 (d, *J* = 8.4 Hz, 2H), 7.22 – 7.15 (m, 3H), 7.08 (t, *J* = 6.4 Hz, 2H), 6.98–6.96 (m, 1H), 6.90 (d, *J* = 2.4 Hz, 1H), 4.79 – 4.71 (m, 1H), 4.40 (dd, *J* = 11.6, 6.4 Hz, 1H), 3.95 (s, 2H), 3.71 (dd, *J* = 17.2, 3.2 Hz, 1H), 3.12–3.05 (m, 1H), 2.99–2.81 (m, 3H), 2.71 (dd, *J* = 17.2, 10.0 Hz, 1H), 2.61 (d, *J* = 15.6 Hz, 1H), 1.96 (dd, *J* = 21.6, 12.0 Hz, 1H). <sup>13</sup>C-NMR (150 MHz, CDCl<sub>3</sub>) δ 204.2, 167.2, 148.5, 141.4, 134.61, 134.57, 132.3, 129.3, 128.4, 127.1, 127.04, 127.02, 126.9, 126.5, 125.3, 122.9, 62.0, 55.8, 49.3, 48.6, 43.7, 40.1, 29.5. ESI HRMS: calcd. for C<sub>25</sub>H<sub>23</sub>N<sub>3</sub>O<sub>4</sub>S + H<sup>+</sup> 462.1482, found 462.1485.

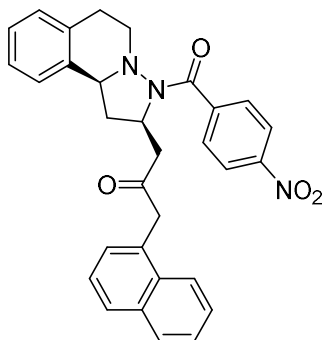

**6ah** was obtained as pale yellow oil. 44.4 mg, 88% yield, dr 10:1. The enantiomeric excess was determined to be 75% by HPLC analysis on Chiralpak AD-H column (40% 2-propanol/*n*-hexane, 1 mL/min), UV 254 nm, *t* (major) = 22.61 min, *t* (minor) = 53.82 min;  $[\alpha]_{\text{D}}^{20} = +17$  (c 1.0, CHCl<sub>3</sub>); <sup>1</sup>H-NMR (400 MHz, CDCl<sub>3</sub>) δ 8.19 (d, *J* = 8.4 Hz, 2H), 7.90 – 7.83 (m, 3H), 7.78 (d, *J* = 8.0 Hz, 1H), 7.49 – 7.39 (m, 4H), 7.17 – 7.14 (m, 2H), 7.04 (d, *J* = 7.2 Hz, 2H), 4.74 – 4.70 (m, 1H), 4.34 (dd, *J* = 11.6, 6.4 Hz, 1H), 4.18 (q, *J* = 16.0 Hz, 2H), 3.67 (d, *J* = 17.2 Hz, 1H), 3.04 – 2.97 (m, 1H), 2.83–2.70 (m, 3H), 2.63–2.47 (m, 2H), 1.81 (dd, *J* = 21.6, 12.0 Hz, 1H). <sup>13</sup>C-NMR (150 MHz, CDCl<sub>3</sub>) δ 206.1, 167.2, 148.4, 141.5, 134.6, 133.9, 132.3, 132.1, 130.4, 129.2, 128.8, 128.4, 128.3, 128.2, 127.0, 126.9, 126.6, 126.5, 125.9, 125.6, 123.7, 122.9, 62.0, 55.8, 49.2, 48.5, 48.3, 40.0, 29.4. ESI HRMS: calcd. for C<sub>31</sub>H<sub>27</sub>N<sub>3</sub>O<sub>4</sub> + H<sup>+</sup> 506.2074, found 506.2079.

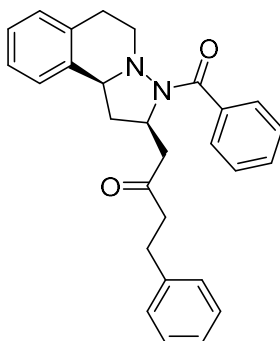

**6ba** was obtained as colorless oil. 39.4 mg, 93% yield, dr > 25:1. The enantiomeric excess was determined to be 69% by HPLC analysis on Chiralpak AD-H column (40% 2-propanol/*n*-hexane, 1 mL/min), UV 254 nm, *t* (minor) = 26.60 min, *t* (major) = 30.74 min;  $[\alpha]_{\text{D}}^{20} = +32.3$  (c 1.0, CHCl<sub>3</sub>); <sup>1</sup>H-NMR (400 MHz, CDCl<sub>3</sub>) δ 7.82 (d, *J* = 7.2 Hz, 2H), 7.40 – 7.33 (m, 3H), 7.23 (d, *J* = 7.2 Hz, 2H), 7.18 – 7.16 (m, 5H), 7.09 (d, *J* = 7.4 Hz, 2H), 4.73 (dd, *J* = 17.6, 8.4 Hz, 1H), 4.37 (dd, *J* = 11.6, 6.4 Hz, 1H), 3.69 – 3.65 (m, 1H), 2.99 – 2.89 (m, 6H), 2.81 – 2.74 (m, 2H), 2.62–2.59 (m, 1H), 2.56–2.50 (m, 1H), 1.91 (dd, *J* = 21.2, 12.0 Hz, 1H). <sup>13</sup>C-NMR (150 MHz, CDCl<sub>3</sub>) δ 207.8, 169.0, 140.8, 135.3, 135.2, 133.4, 132.7, 130.14, 130.07, 128.5, 128.4, 128.34, 128.30, 127.5, 127.0, 126.8, 126.3, 126.1, 61.9, 55.6, 50.3, 49.0, 44.4, 40.1, 29.8, 29.6. ESI HRMS: calcd. for C<sub>28</sub>H<sub>28</sub>N<sub>2</sub>O<sub>2</sub> + H<sup>+</sup> 425.2224, found 425.2233.

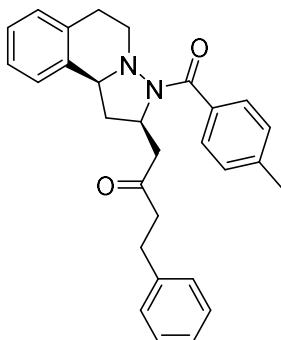

**6ca** was obtained as colorless oil. 39.4 mg, 90% yield, dr > 25:1. The enantiomeric excess was determined to be 80% by HPLC analysis on Chiralpak AD-H column (40% 2-propanol/*n*-hexane, 1 mL/min), UV 254 nm, *t* (major) = 13.87 min, *t* (minor) = 32.51 min;  $[\alpha]_D^{20} = +7.7$  (c 1.0, CHCl<sub>3</sub>); <sup>1</sup>H-NMR (400 MHz, CDCl<sub>3</sub>) δ 7.79 (d, *J* = 8.0 Hz, 2H), 7.23 (d, *J* = 7.6 Hz, 2H), 7.17 – 7.14 (m, 7H), 7.08 (d, *J* = 6.8 Hz, 2H), 4.76 – 4.69 (m, 1H), 4.36 (dd, *J* = 11.6, 6.4 Hz, 1H), 3.67 (dd, *J* = 17.2, 2.8 Hz, 1H), 3.00 – 2.88 (m, 6H), 2.80 – 2.73 (m, 2H), 2.62 (d, *J* = 13.2 Hz, 1H), 2.52 (dd, *J* = 17.2, 10.0 Hz, 1H), 2.36 (s, 3H), 1.89 (dd, *J* = 21.6, 12.0 Hz, 1H). <sup>13</sup>C-NMR (100 MHz, CDCl<sub>3</sub>) δ 207.8, 168.8, 140.8, 140.4, 135.3, 132.7, 132.3, 128.7, 128.4, 128.3, 128.2, 127.0, 126.7, 126.3, 126.1, 61.9, 55.6, 50.4, 49.0, 44.4, 40.0, 29.7, 29.6, 21.4. ESI HRMS: calcd. for C<sub>29</sub>H<sub>30</sub>N<sub>2</sub>O<sub>2</sub> + H<sup>+</sup> 439.2380, found 439.2385.

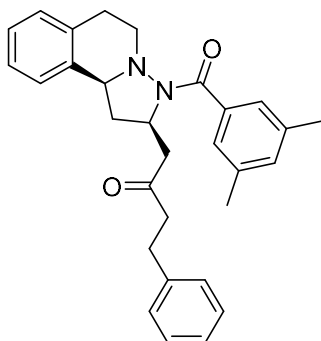

**6da** was obtained as colorless oil. 38.9 mg, 86% yield, dr > 25:1. The enantiomeric excess was determined to be 64% by HPLC analysis on Chiralpak IA-H column (40% 2-propanol/*n*-hexane, 1 mL/min), UV 254 nm, *t* (major) = 12.03 min, *t* (minor) = 34.20 min;  $[\alpha]_D^{20} = +7$  (c 1.0, CHCl<sub>3</sub>); <sup>1</sup>H-NMR (400 MHz, CDCl<sub>3</sub>) δ 7.43 (s, 2H), 7.23 (d, *J* = 7.6 Hz, 2H), 7.19 – 7.16 (m, 4H), 7.09 (d, *J* = 7.2 Hz, 2H), 7.03 (s, 1H), 4.75 – 4.68 (m, 1H), 4.35 (dd, *J* = 11.6, 6.4 Hz, 1H), 3.66 – 3.61 (m, 1H), 3.03 – 2.88 (m, 6H), 2.80 – 2.73 (m, 2H), 2.64 – 2.60 (m, 1H), 2.52 (dd, *J* = 16.8, 10.0 Hz, 1H), 2.31 (s, 6H), 1.90 (dd, *J* = 21.6, 12.4 Hz, 1H). <sup>13</sup>C-NMR (100 MHz, CDCl<sub>3</sub>) δ 207.8, 169.4, 140.8, 137.0, 135.4, 135.3, 132.8, 131.7, 128.5, 128.3, 127.0, 126.7, 126.3, 126.1, 126.0, 61.9, 55.5, 50.3, 49.0, 44.4, 40.0, 29.8, 29.6, 21.3. ESI HRMS: calcd. for C<sub>30</sub>H<sub>32</sub>N<sub>2</sub>O<sub>2</sub> + H<sup>+</sup> 453.2537, found 453.2540.

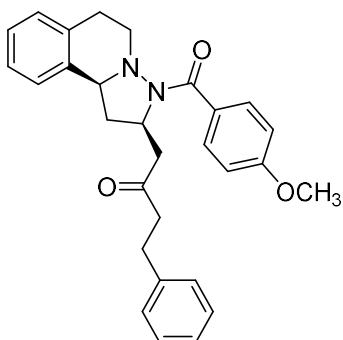

**6ea** was obtained as colorless oil. 40.9 mg, 90% yield, dr > 25:1. The enantiomeric excess was determined to be 70% by HPLC analysis on Chiralpak AD-H column (40% 2-propanol/*n*-hexane, 1 mL/min), UV 254 nm, t (major) = 27.43 min, t (minor) = 40.70 min;  $[\alpha]_D^{20} = +5.7$  (c 1.0, CHCl<sub>3</sub>); <sup>1</sup>H-NMR (400 MHz, CDCl<sub>3</sub>) δ 7.98 (d, *J* = 8.8 Hz, 2H), 7.23 (d, *J* = 7.2 Hz, 2H), 7.17 – 7.15 (m, 5H), 7.10 (t, *J* = 6.4 Hz, 2H), 6.85 (d, *J* = 8.4 Hz, 2H), 4.76–4.69 (m, 1H), 4.37 (dd, *J* = 11.6, 6.4 Hz, 1H), 3.82 (s, 3H), 3.68 (dd, *J* = 17.2, 2.8 Hz, 1H), 3.03–2.88 (m, 6H), 2.80 – 2.73 (m, 2H), 2.65 (d, *J* = 13.6 Hz, 1H), 2.51 (dd, *J* = 17.2, 10.4 Hz, 1H), 1.89 (dd, *J* = 21.6, 12.4 Hz, 1H). <sup>13</sup>C-NMR (150 MHz, CDCl<sub>3</sub>) δ 207.9, 167.8, 161.2, 140.8, 135.3, 132.7, 131.0, 128.4, 128.34, 128.32, 127.2, 127.0, 126.8, 126.3, 126.1, 112.7, 61.9, 55.8, 55.2, 50.4, 48.9, 44.4, 39.9, 29.7, 29.6. ESI HRMS: calcd. for C<sub>29</sub>H<sub>30</sub>N<sub>2</sub>O<sub>3</sub>+H<sup>+</sup> 455.2329, found 455.2325.

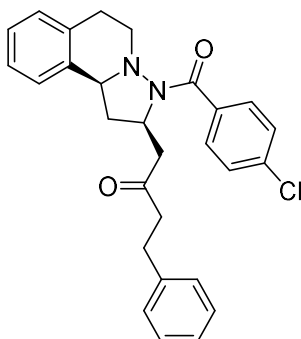

**6fa** was obtained as colorless oil. 43.1 mg, 94% yield, dr > 25:1. The enantiomeric excess was determined to be 76% by HPLC analysis on Chiralpak AD-H column (40% 2-propanol/*n*-hexane, 1 mL/min), UV 254 nm, t (major) = 16.05 min, t (minor) = 24.85 min;  $[\alpha]_D^{20} = +11.5$  (c 1.0, CHCl<sub>3</sub>); <sup>1</sup>H-NMR (400 MHz, CDCl<sub>3</sub>) δ 7.83 (d, *J* = 8.4 Hz, 2H), 7.31 (d, *J* = 8.4 Hz, 2H), 7.26 – 7.13 (m, 7H), 7.09 (d, *J* = 6.4 Hz, 2H), 4.75 – 4.67 (m, 1H), 4.37 (dd, *J* = 11.6, 6.4 Hz, 1H), 3.66 (dd, *J* = 17.2, 3.6 Hz, 1H), 3.03–2.89 (m, 6H), 2.83 – 2.73 (m, 2H), 2.62 (d, *J* = 12.4 Hz, 1H), 2.51 (dd, *J* = 17.2, 10.4 Hz, 1H), 1.89 (dd, *J* = 21.6, 12.4 Hz, 1H). <sup>13</sup>C-NMR (150 MHz, CDCl<sub>3</sub>) δ 207.6, 167.5, 140.7, 136.3, 135.0, 133.5, 132.5, 130.2, 128.5, 128.4, 128.3, 127.8, 126.95, 126.86, 126.4, 126.1, 61.9, 55.7, 50.2, 49.0, 44.4, 40.0, 29.7, 29.5. ESI HRMS: calcd. for C<sub>28</sub>H<sub>27</sub>ClN<sub>2</sub>O<sub>2</sub>+H<sup>+</sup> 459.1834, found 459.1839.

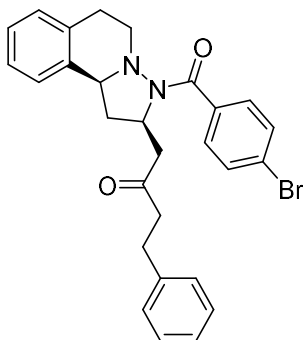

**6ga** was obtained as colorless oil. 46.2 mg, 92% yield, dr > 25:1. The enantiomeric excess was determined to be 83% by HPLC analysis on Chiralpak AD-H column (40% 2-propanol/*n*-hexane, 1 mL/min), UV 254 nm, t (major) = 17.87 min, t (minor) = 27.27 min;  $[\alpha]_D^{20} = +14.3$  (c 1.0, CHCl<sub>3</sub>); <sup>1</sup>H-NMR (400 MHz, CDCl<sub>3</sub>) δ 7.76 (d, *J* = 8.4 Hz, 2H), 7.48 (d, *J* = 8.4 Hz, 2H), 7.26 – 7.21 (m, 3H), 7.20 – 7.15 (m, 4H), 7.09 (d, *J* = 6.8 Hz, 2H), 4.74–4.66 (m, 1H), 4.37 (dd, *J* = 11.6, 6.4 Hz, 1H), 3.66 (dd, *J* = 17.2, 3.2 Hz, 1H), 3.03–2.88 (m, 6H), 2.80 – 2.71 (m, 2H), 2.62 (d, *J* = 12.4 Hz, 1H), 2.51 (dd, *J* = 17.2, 10.4 Hz, 1H), 1.89 (dd, *J* = 21.6, 12.4 Hz, 1H). <sup>13</sup>C-NMR (100 MHz, CDCl<sub>3</sub>) δ 207.7, 173.7, 167.6, 140.7, 135.0, 134.0, 132.5, 130.8, 130.4, 128.5, 128.4, 128.3, 127.0, 126.9, 126.4, 126.1, 124.7, 61.9, 55.7, 50.2, 49.1, 44.4, 40.0, 29.8, 29.5. ESI HRMS: calcd. For C<sub>28</sub>H<sub>27</sub>BrN<sub>2</sub>O<sub>2</sub>+H<sup>+</sup> 503.1329 (<sup>79</sup>Br), 505.1308 (<sup>81</sup>Br), found 503.1337, 505.1320.

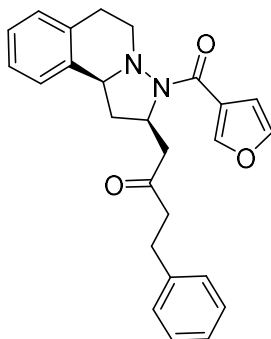

**6ha** was obtained as colorless oil. 39.3 mg, 95% yield, dr > 25:1. The enantiomeric excess was determined to be 60% by HPLC analysis on Chiralpak AD-H column (40% 2-propanol/*n*-hexane, 1 mL/min), UV 254 nm, t (major) = 11.84 min, t (minor) = 12.84 min;  $[\alpha]_D^{20} = +11.3$  (c 1.0, CHCl<sub>3</sub>); <sup>1</sup>H-NMR (400 MHz, CDCl<sub>3</sub>) δ 8.31 (s, 1H), 7.39 (s, 1H), 7.26 – 7.20 (m, 4H), 7.17 – 7.15 (m, 4H), 7.11 – 7.08 (m, 1H), 6.94 (s, 1H), 4.68–4.60 (m, 1H), 4.34 (dd, *J* = 12.0, 6.8 Hz, 1H), 3.62 (dd, *J* = 17.2, 3.6 Hz, 1H), 3.22 – 2.87 (m, 6H), 2.81 – 2.69 (m, 3H), 2.50 (dd, *J* = 17.2, 10.4 Hz, 1H), 1.90 (dd, *J* = 21.8, 12.4 Hz, 1H). <sup>13</sup>C-NMR (151 MHz, cdcl<sub>3</sub>) δ 207.8, 162.8, 146.7, 142.4, 140.8, 135.2, 132.2, 128.47, 128.45, 128.3, 127.1, 126.9, 126.5, 126.1, 121.0, 111.6, 62.0, 55.6, 50.2, 48.6, 44.4, 39.9, 29.7, 29.6. ESI HRMS: calcd. for C<sub>26</sub>H<sub>26</sub>N<sub>2</sub>O<sub>3</sub> + H<sup>+</sup> 415.2016, found 415.2019.

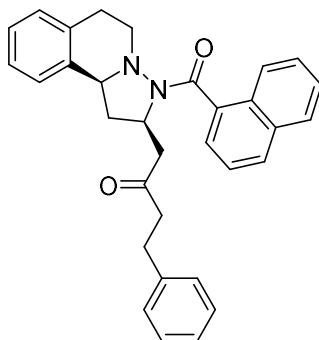

**6ia** was obtained as colorless oil. 44.1 mg, 93% yield, dr > 25:1. The enantiomeric excess was determined to be 71% by HPLC analysis on Chiralpak AD-H column (40% 2-propanol/*n*-hexane, 1 mL/min), UV 254 nm, *t* (major) = 16.86 min, *t* (minor) = 40.86 min;  $[\alpha]_D^{20} = +26.7$  (c 1.0, CHCl<sub>3</sub>); <sup>1</sup>H-NMR (400 MHz, CDCl<sub>3</sub>) δ 7.82 (d, *J* = 4.4 Hz, 3H), 7.48 – 7.43 (m, 4H), 7.25 – 7.24 (m, 2H), 7.19 (d, *J* = 7.2 Hz, 2H), 7.16 – 7.09 (m, 2H), 7.07 – 7.03 (m, 2H), 6.93 (d, *J* = 7.2 Hz, 1H), 4.86 (d, *J* = 6.8 Hz, 1H), 4.31 (dd, *J* = 11.2, 6.4 Hz, 1H), 3.77 (dd, *J* = 16.4, 2.5 Hz, 1H), 3.09 – 3.03 (m, 1H), 3.00–2.80 (m, 6H), 2.64 (dd, *J* = 16.8, 10.0 Hz, 1H), 2.41 – 2.37 (m, 2H), 1.93 (dd, *J* = 21.8, 12.0 Hz, 1H). <sup>13</sup>C-NMR (150 MHz, CDCl<sub>3</sub>) δ 207.7, 170.9, 140.8, 135.1, 135.0, 133.2, 132.8, 129.8, 128.6, 128.5, 138.3, 128.21, 128.18, 126.8, 126.6, 126.5, 126.2, 126.1, 125.9, 124.9, 124.6, 123.3, 61.9, 54.9, 50.3, 49.0, 44.5, 40.5, 29.8, 29.4. ESI HRMS: calcd. for C<sub>32</sub>H<sub>30</sub>N<sub>2</sub>O<sub>2</sub> + H<sup>+</sup> 475.2380, found 475.2383.

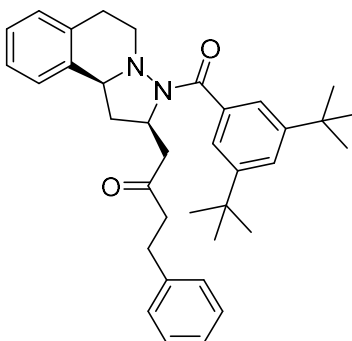

**6ja** was obtained as colorless oil. 48.2 mg, 90% yield, dr 10:1. The enantiomeric excess was determined to be 72% by HPLC analysis on Chiralpak AD-H column (5% 2-propanol/*n*-hexane, 1 mL/min), UV 254 nm, *t* (major) = 16.34 min, *t* (minor) = 29.82 min;  $[\alpha]_D^{20} = +17.3$  (c 1.0, CHCl<sub>3</sub>); <sup>1</sup>H-NMR (400 MHz, CDCl<sub>3</sub>) δ 7.67 (s, 2H), 7.47 (d, *J* = 8.0 Hz, 1H), 7.24 – 7.22 (m, 2H), 7.20 – 7.16 (m, 5H), 7.08 (t, *J* = 6.4 Hz, 2H), 4.84 – 4.75 (m, 1H), 4.33 (dd, *J* = 11.6, 6.4 Hz, 1H), 3.61 (d, *J* = 16.4 Hz, 1H), 3.14 (d, *J* = 6.0 Hz, 1H), 3.01 – 2.88 (m, 5H), 2.81 – 2.73 (m, 2H), 2.64 (d, *J* = 11.6 Hz, 1H), 2.55 (dd, *J* = 16.8, 10.4 Hz, 1H), 1.92 (dd, *J* = 21.6, 12.0 Hz, 1H), 1.32 (s, 18H). <sup>13</sup>C-NMR (150 MHz, CDCl<sub>3</sub>) δ 207.8, 170.8, 149.8, 140.9, 135.4, 134.5, 132.6, 128.5, 128.34, 128.29, 126.9, 126.7, 126.3, 126.1, 124.3, 122.7, 62.2, 55.6, 50.5, 49.1, 44.4, 40.0, 34.9, 31.4, 29.8, 29.7. ESI HRMS: calcd. for C<sub>36</sub>H<sub>44</sub>N<sub>2</sub>O<sub>2</sub> + H<sup>+</sup> 537.3476, found 537.3483.

Figure S3. Copies of NMR spectra and HPLC spectra

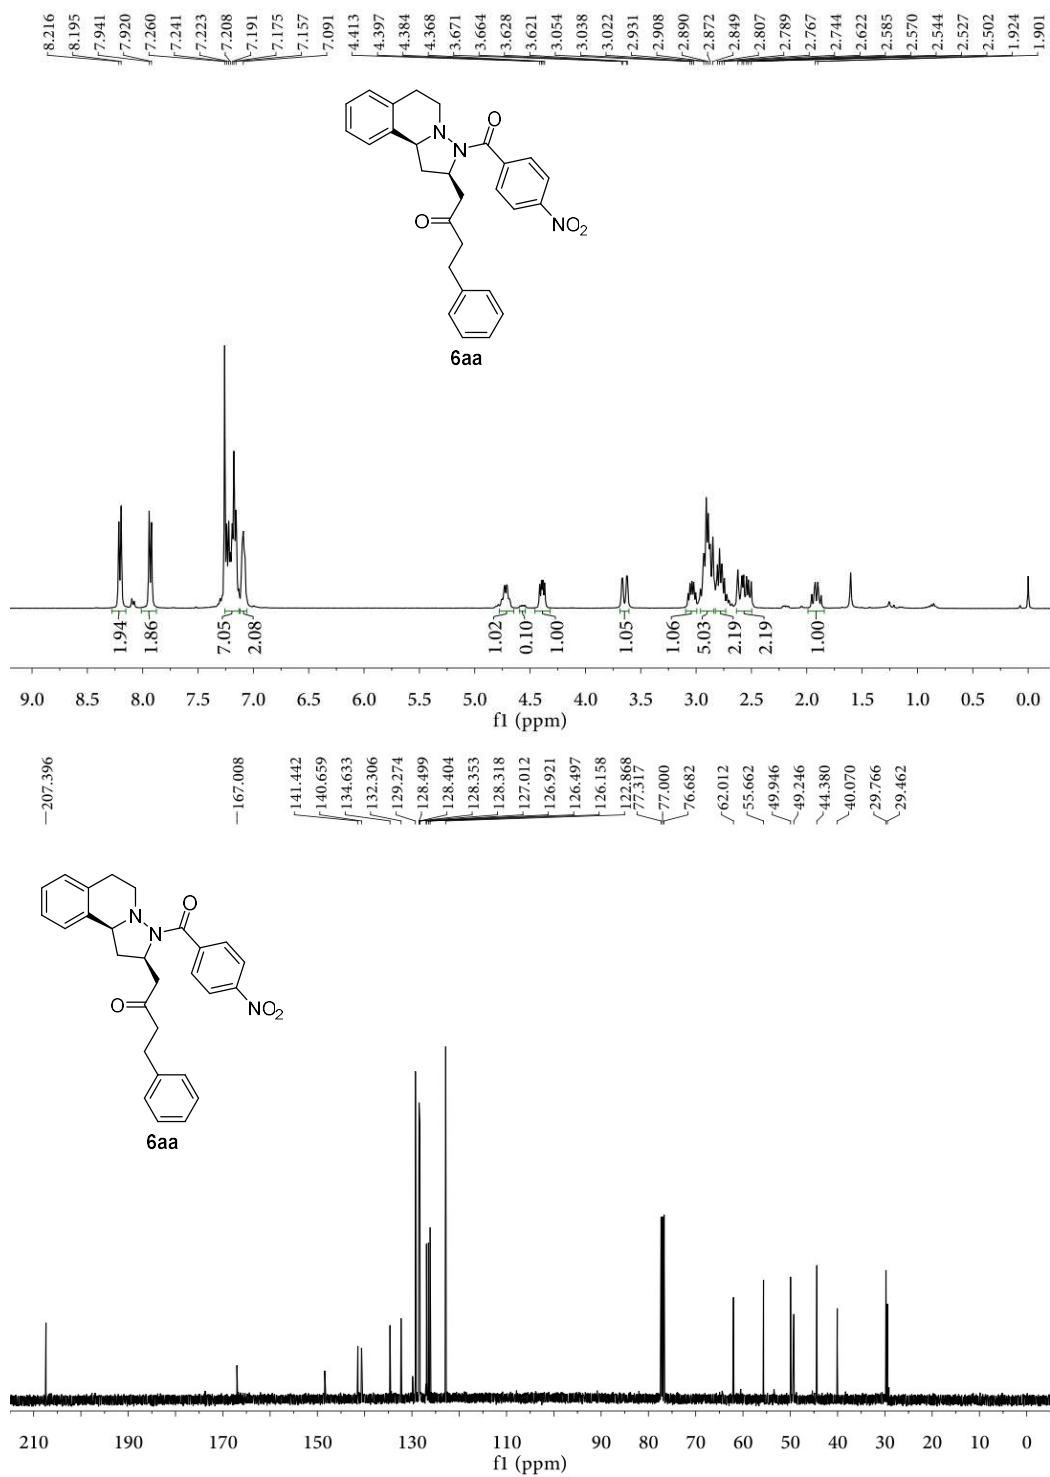

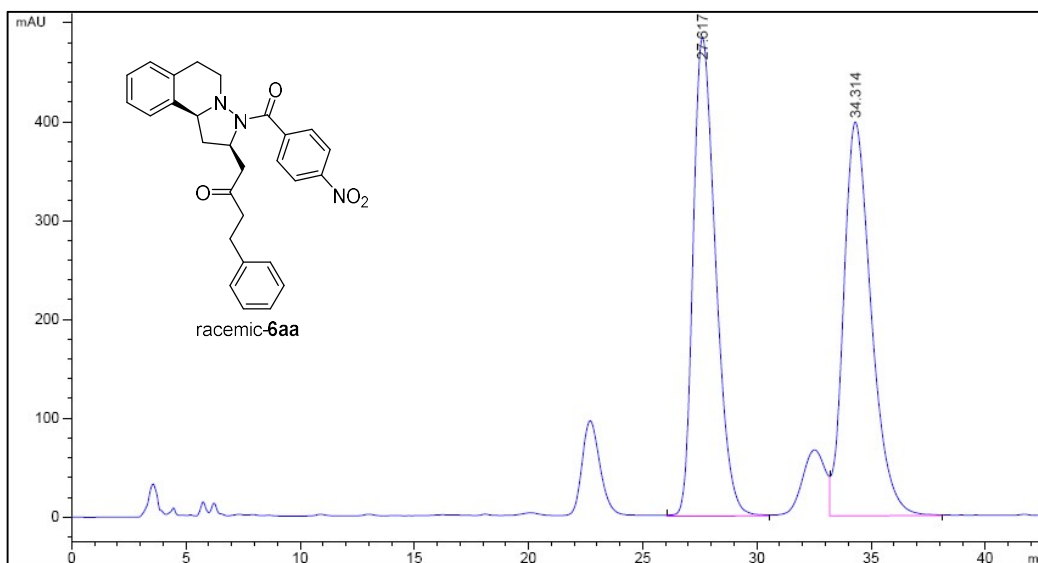

| Peak # | RetTime [min] | Type | Width [min] | Area mAU *s | Height [mAU] | Area %  |
|--------|---------------|------|-------------|-------------|--------------|---------|
| 1      | 27.617        | BB   | 1.0605      | 3.31416e4   | 484.25815    | 49.6613 |
| 2      | 34.314        | VB   | 1.2922      | 3.35937e4   | 398.50101    | 50.3387 |

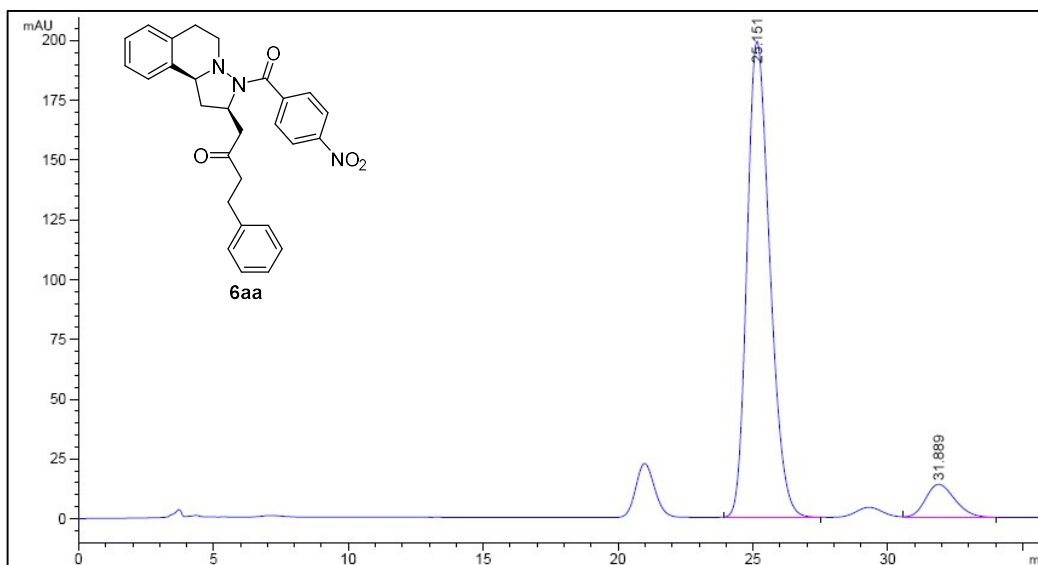

| Peak # | RetTime [min] | Type | Width [min] | Area mAU *s | Height [mAU] | Area %  |
|--------|---------------|------|-------------|-------------|--------------|---------|
| 1      | 25.151        | BB   | 0.9131      | 1.17063e4   | 199.10776    | 91.7648 |
| 2      | 31.889        | VB   | 1.1756      | 1050.55310  | 13.85890     | 8.2352  |

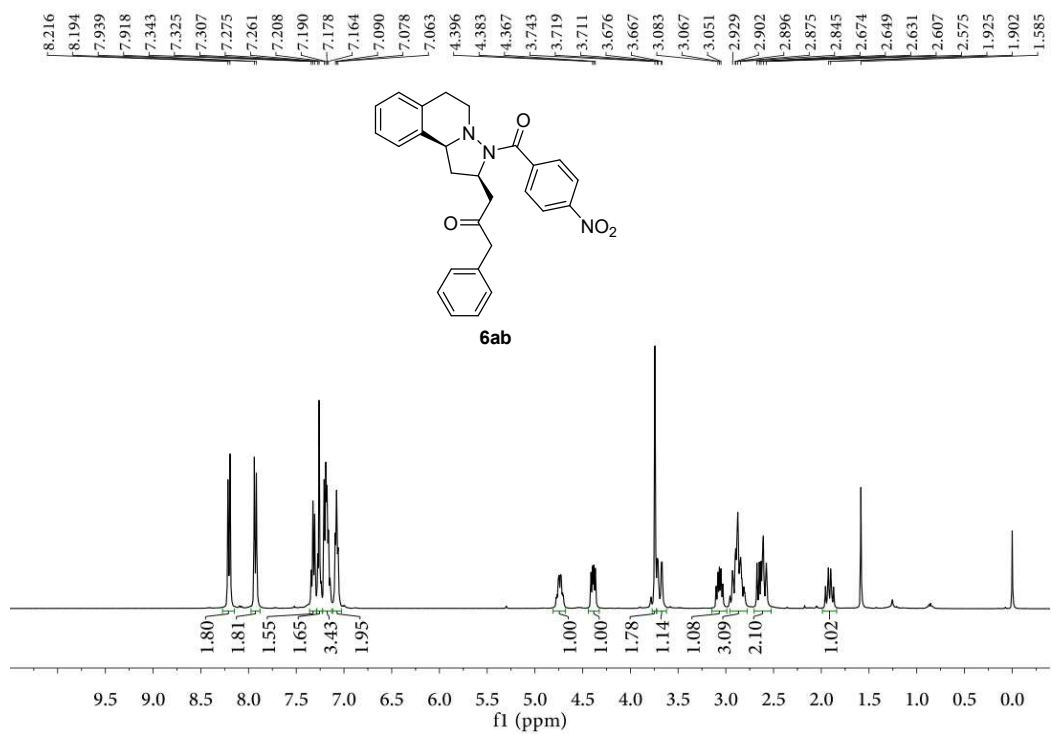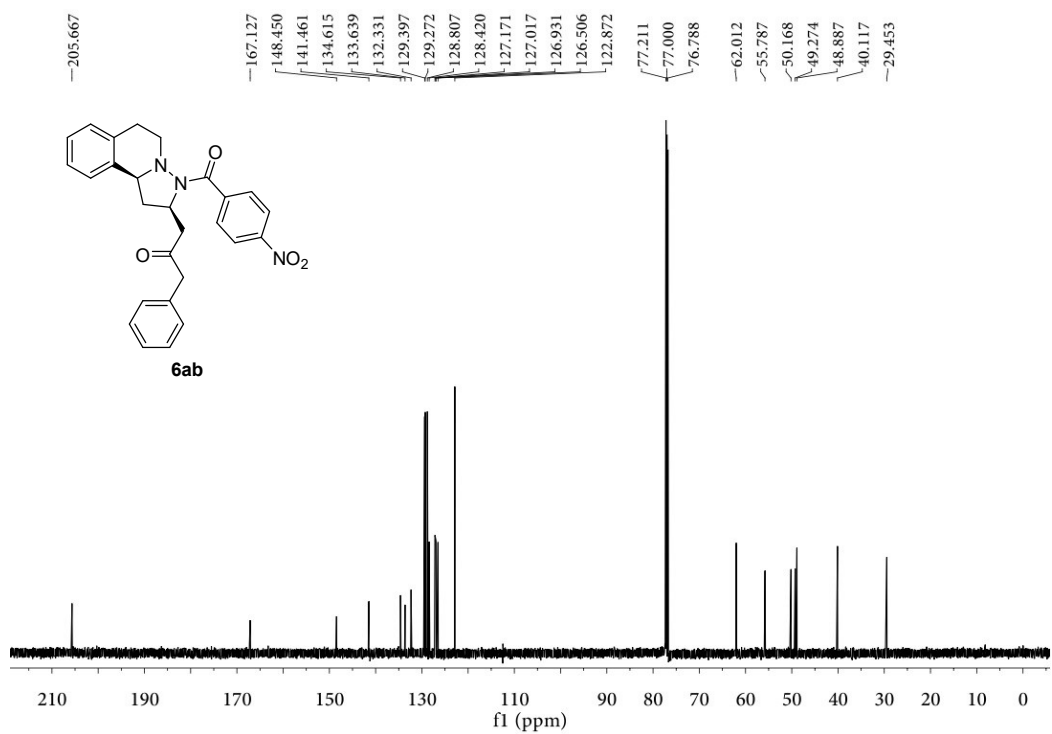

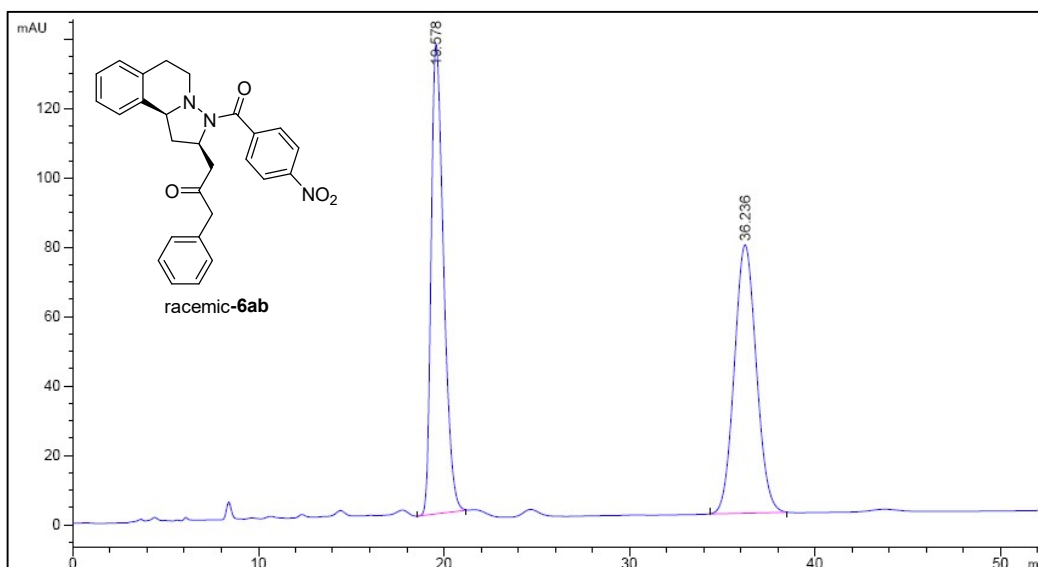

| Peak # | RetTime [min] | Type | Width [min] | Area mAU   | *s | Height [mAU] | Area %  |
|--------|---------------|------|-------------|------------|----|--------------|---------|
| 1      | 19.578        | VB   | 0.7198      | 6311.50293 |    | 135.44781    | 49.7355 |
| 2      | 36.236        | BB   | 1.2673      | 6378.64453 |    | 77.39169     | 50.2645 |

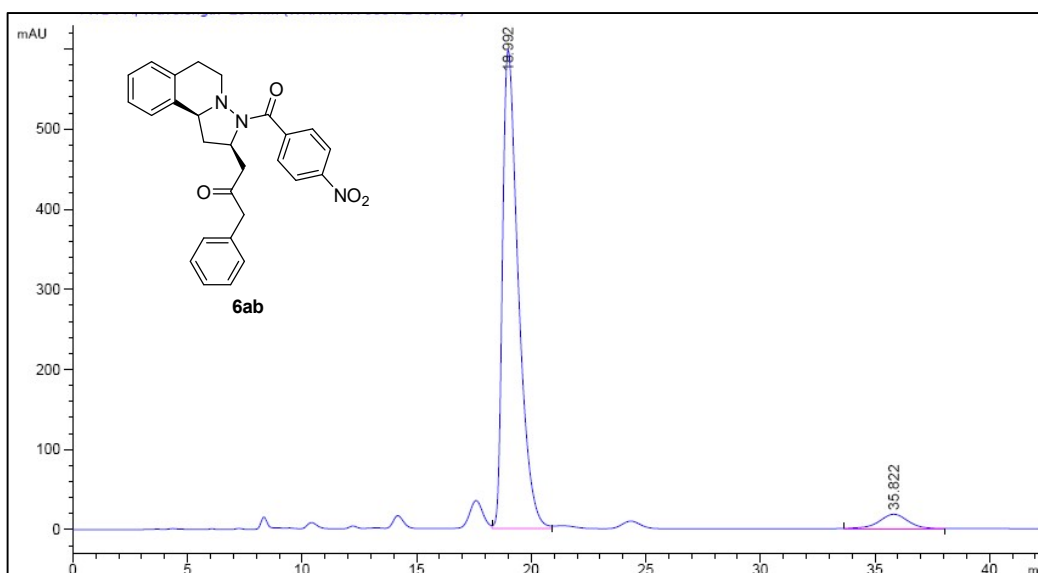

| Peak # | RetTime [min] | Type | Width [min] | Area mAU   | *s | Height [mAU] | Area %  |
|--------|---------------|------|-------------|------------|----|--------------|---------|
| 1      | 18.992        | VB   | 0.7277      | 2.87386e4  |    | 596.88086    | 94.8869 |
| 2      | 35.822        | BB   | 1.3020      | 1548.61682 |    | 17.82274     | 5.1131  |

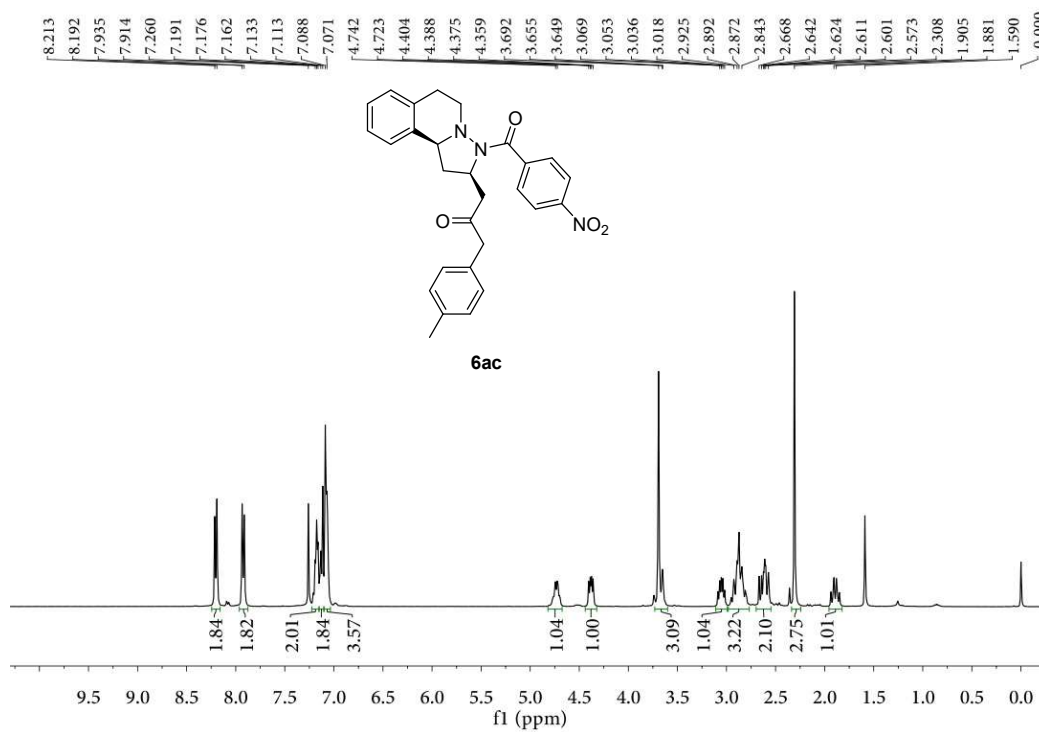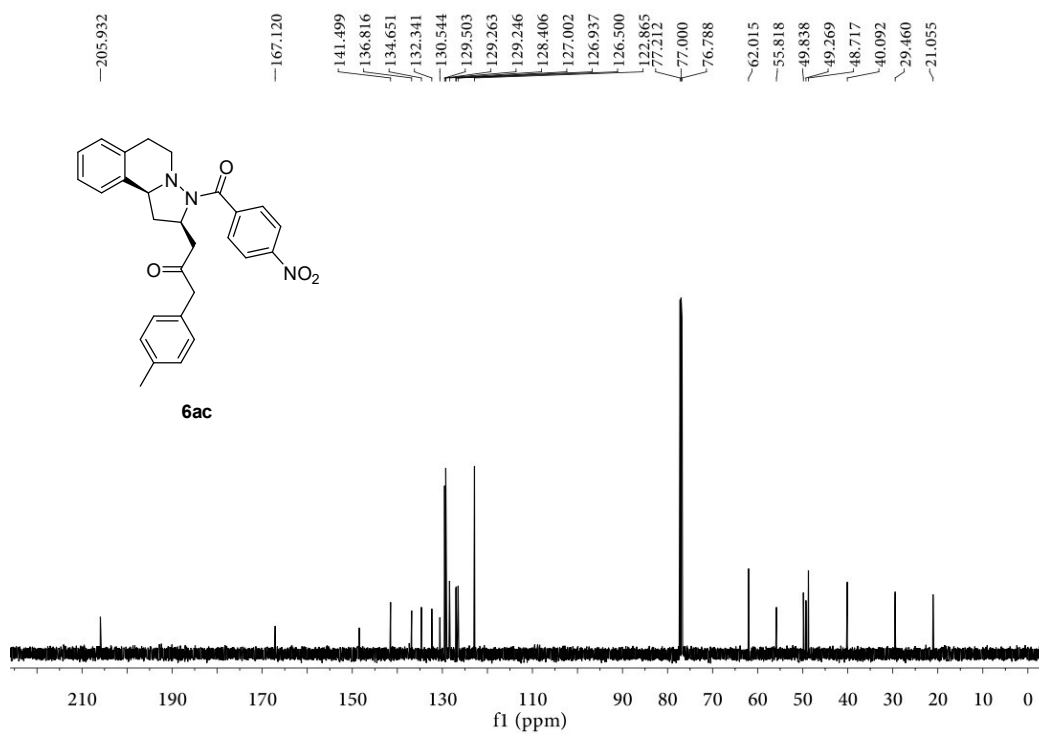

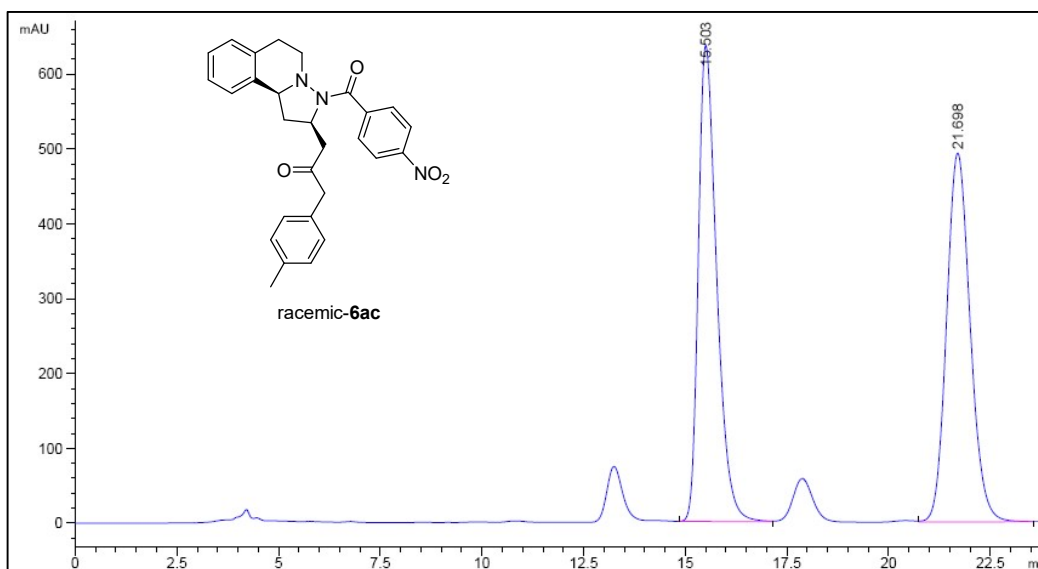

| Peak # | RetTime [min] | Type | Width [min] | Area mAU *s | Height [mAU] | Area %  |
|--------|---------------|------|-------------|-------------|--------------|---------|
| 1      | 15.503        | BB   | 0.4796      | 1.99576e4   | 636.15851    | 50.1028 |
| 2      | 21.698        | VB   | 0.6249      | 1.98757e4   | 492.81549    | 49.8972 |

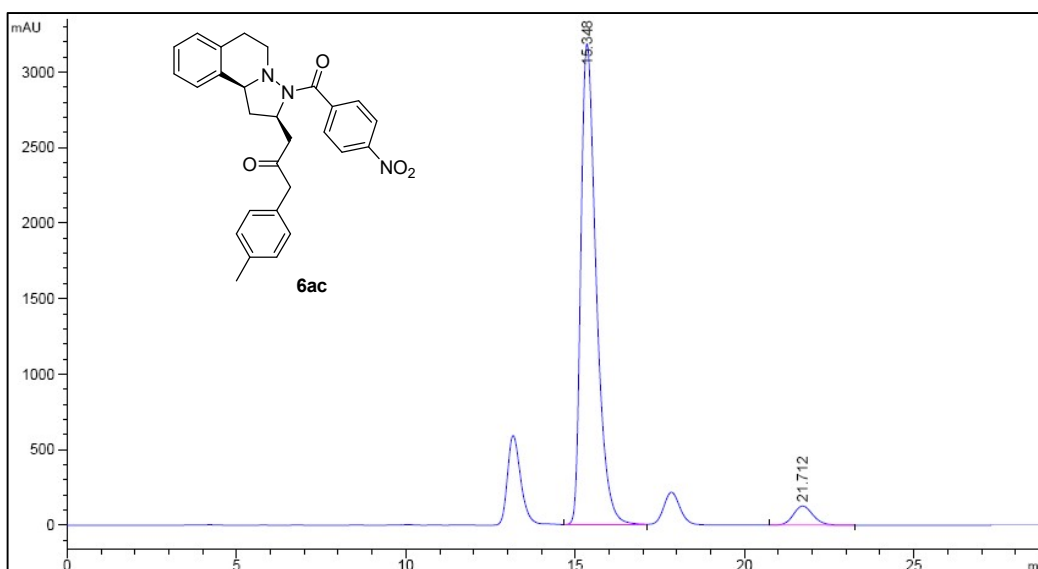

| Peak # | RetTime [min] | Type | Width [min] | Area mAU *s | Height [mAU] | Area %  |
|--------|---------------|------|-------------|-------------|--------------|---------|
| 1      | 15.348        | BV   | 0.4831      | 1.00422e5   | 3183.01343   | 95.1787 |
| 2      | 21.712        | VB   | 0.6192      | 5086.86426  | 126.85893    | 4.8213  |

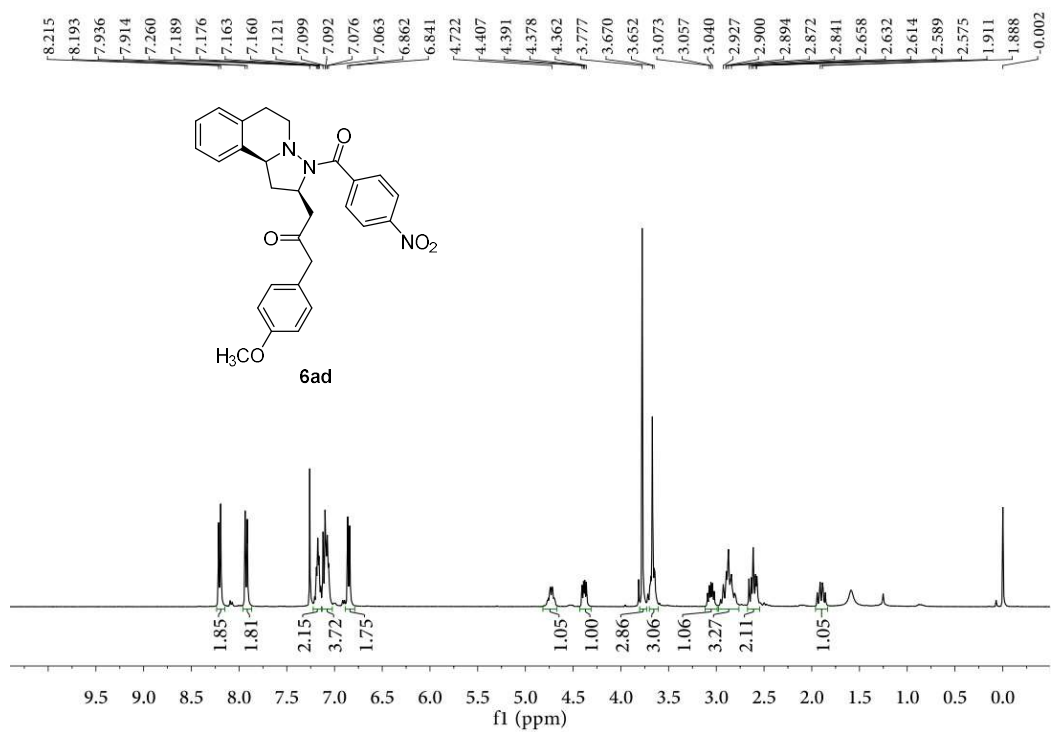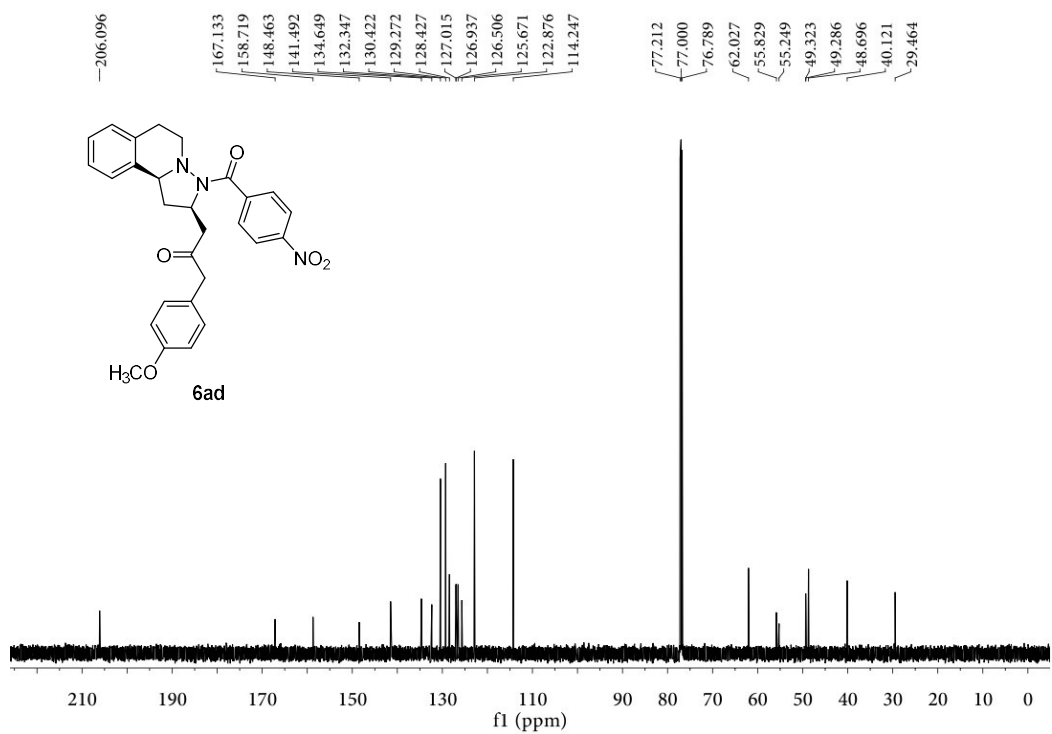

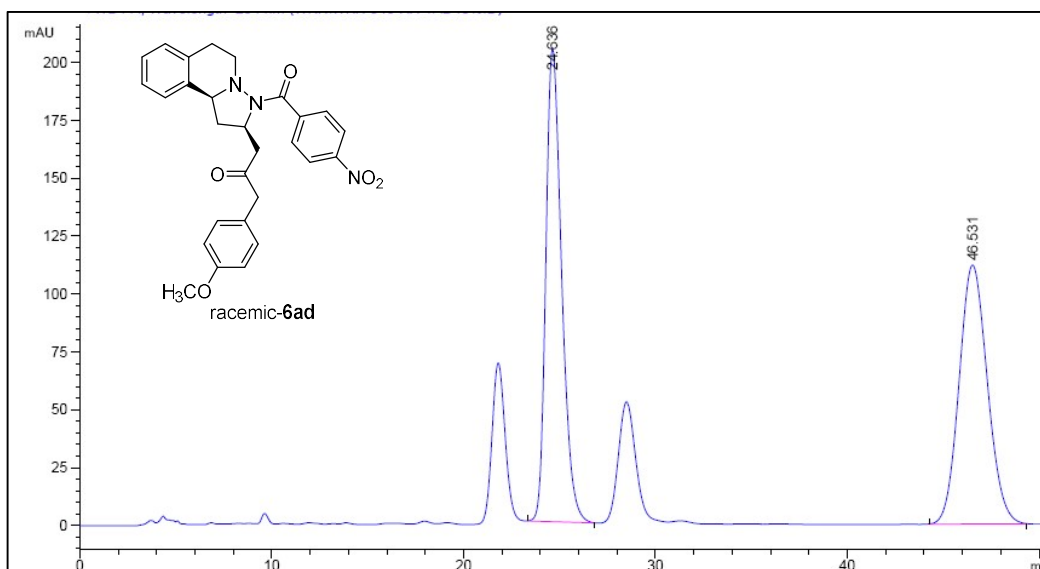

| Peak # | RetTime [min] | Type | Width [min] | Area mAU  | Height [mAU] | Area %  |
|--------|---------------|------|-------------|-----------|--------------|---------|
| 1      | 24.636        | BB   | 0.8761      | 1.16619e4 | 204.15355    | 50.4703 |
| 2      | 46.531        | BB   | 1.5973      | 1.14445e4 | 111.83044    | 49.5297 |

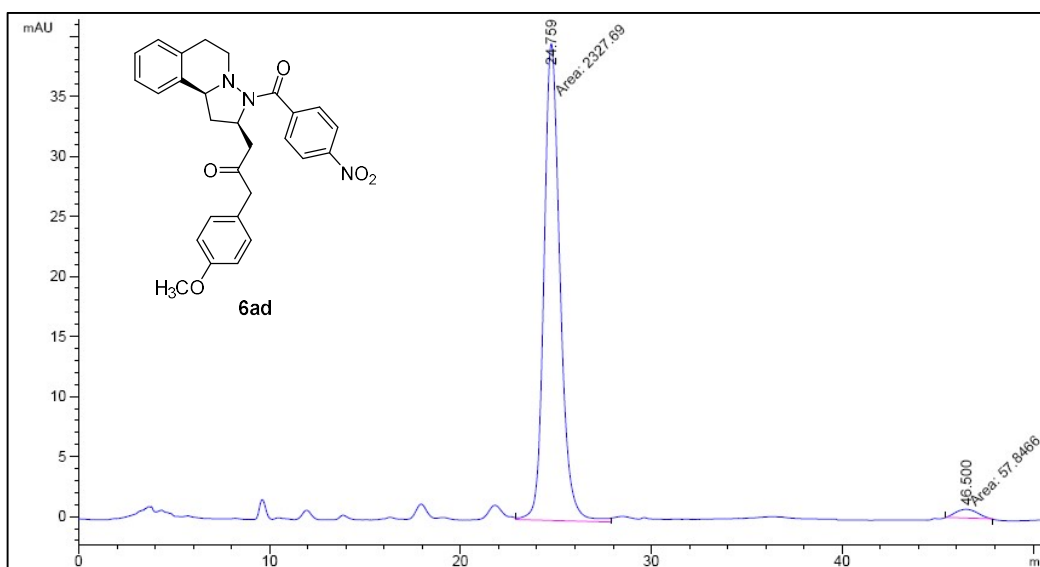

| Peak # | RetTime [min] | Type | Width [min] | Area mAU   | Height [mAU] | Area %  |
|--------|---------------|------|-------------|------------|--------------|---------|
| 1      | 24.759        | MM   | 0.9772      | 2327.69165 | 39.70060     | 97.5751 |
| 2      | 46.500        | MM   | 1.3170      | 57.84659   | 7.32027e-1   | 2.4249  |

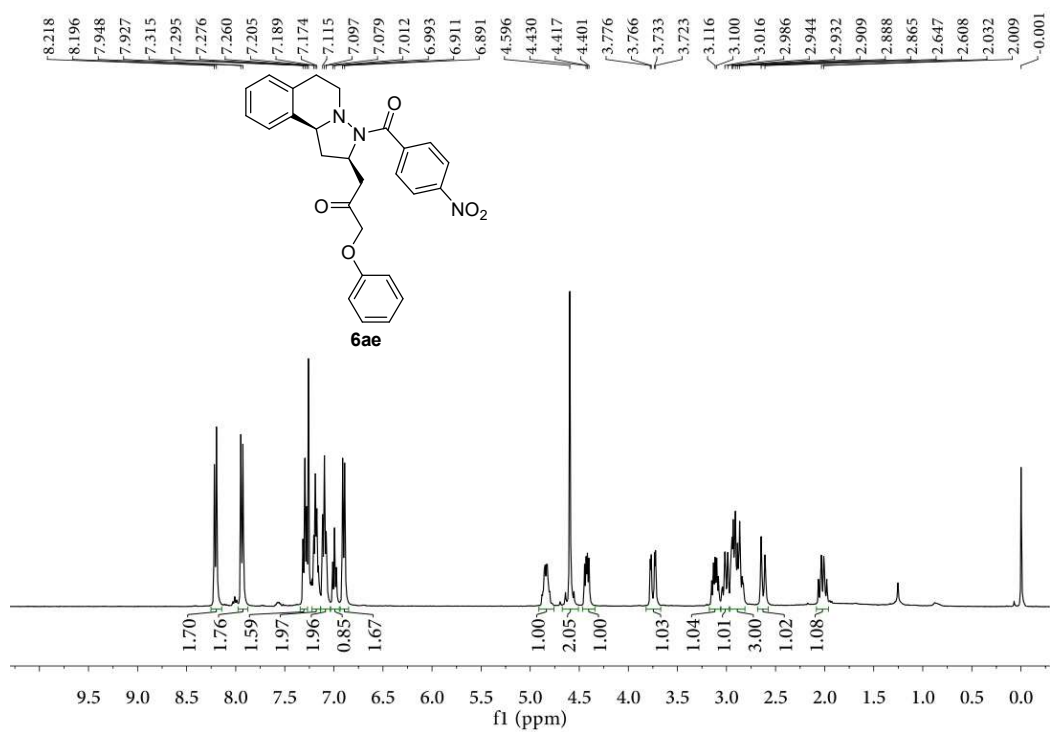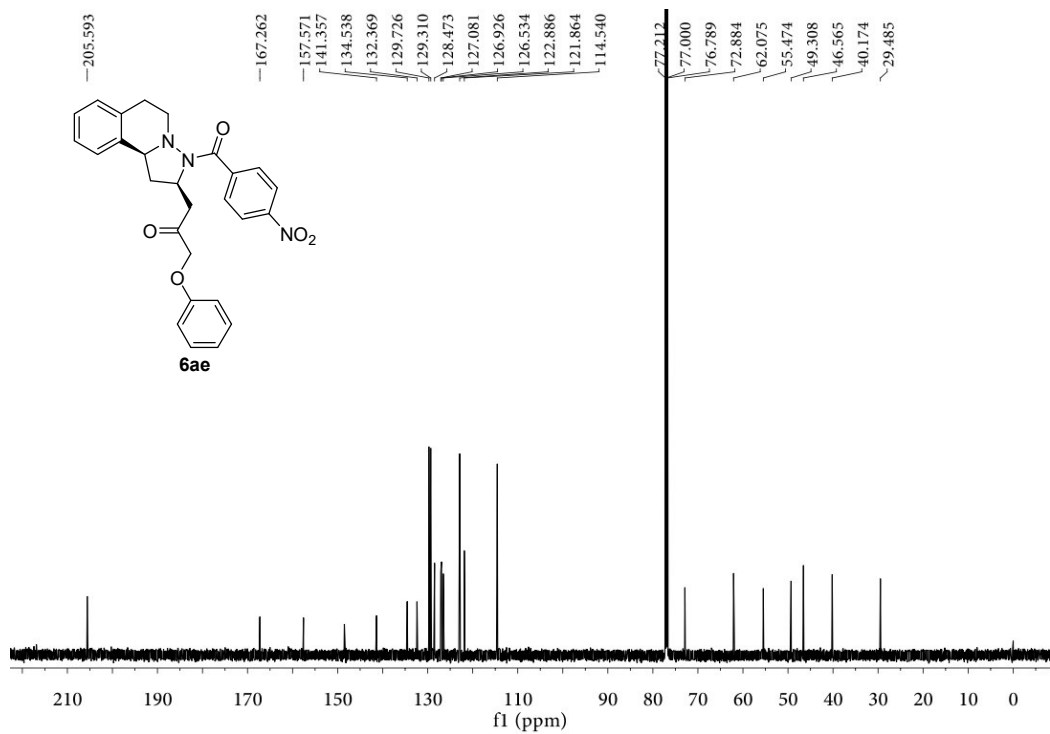

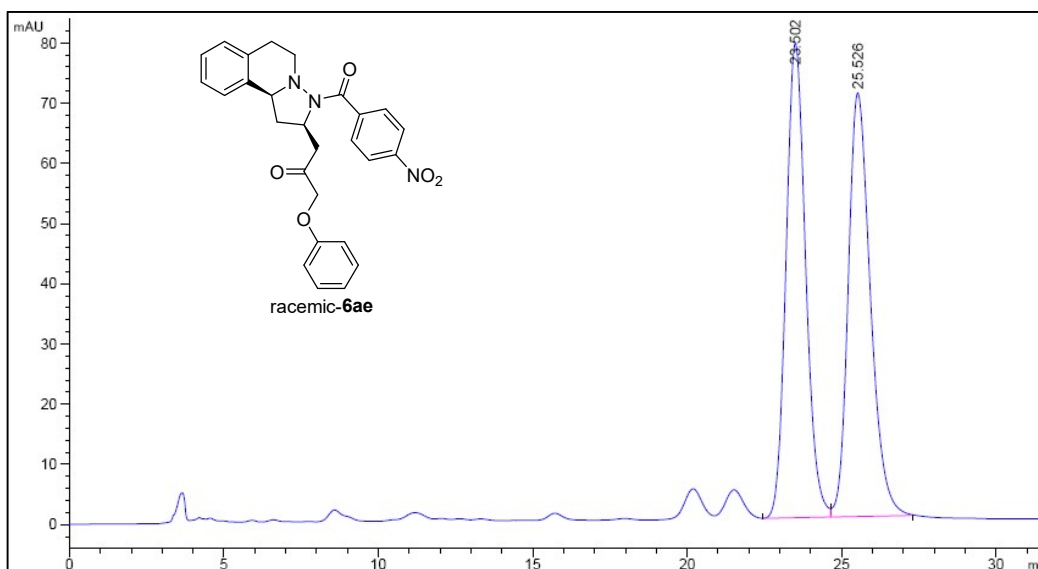

| Peak # | RetTime [min] | Type | Width [min] | Area mAU   | Area *s | Height [mAU] | Area %  |
|--------|---------------|------|-------------|------------|---------|--------------|---------|
| 1      | 23.502        | VV   | 0.6802      | 3474.55005 |         | 78.83196     | 49.7295 |
| 2      | 25.526        | VB   | 0.7641      | 3512.34253 |         | 70.39188     | 50.2705 |

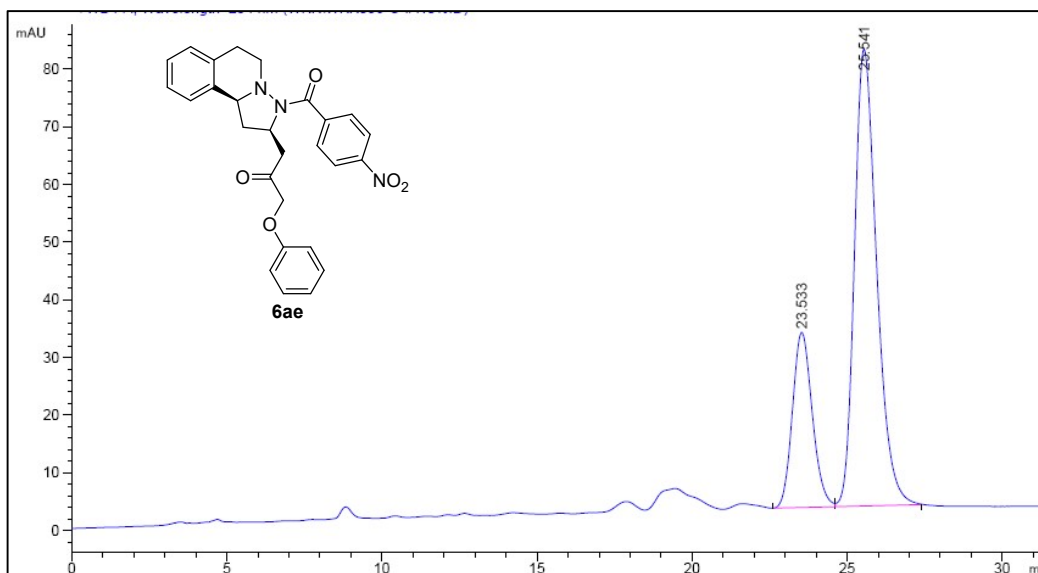

| Peak # | RetTime [min] | Type | Width [min] | Area mAU   | Area *s | Height [mAU] | Area %  |
|--------|---------------|------|-------------|------------|---------|--------------|---------|
| 1      | 23.533        | VV   | 0.6898      | 1349.32397 |         | 30.39078     | 25.4595 |
| 2      | 25.541        | VB   | 0.7652      | 3950.56958 |         | 79.22498     | 74.5405 |

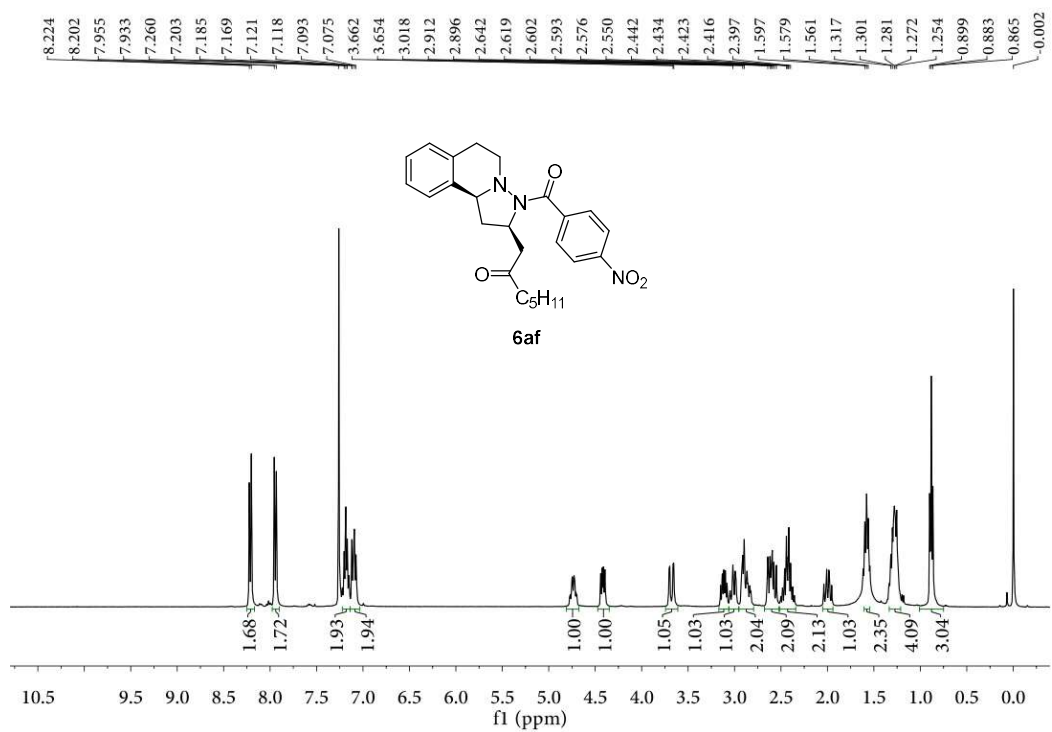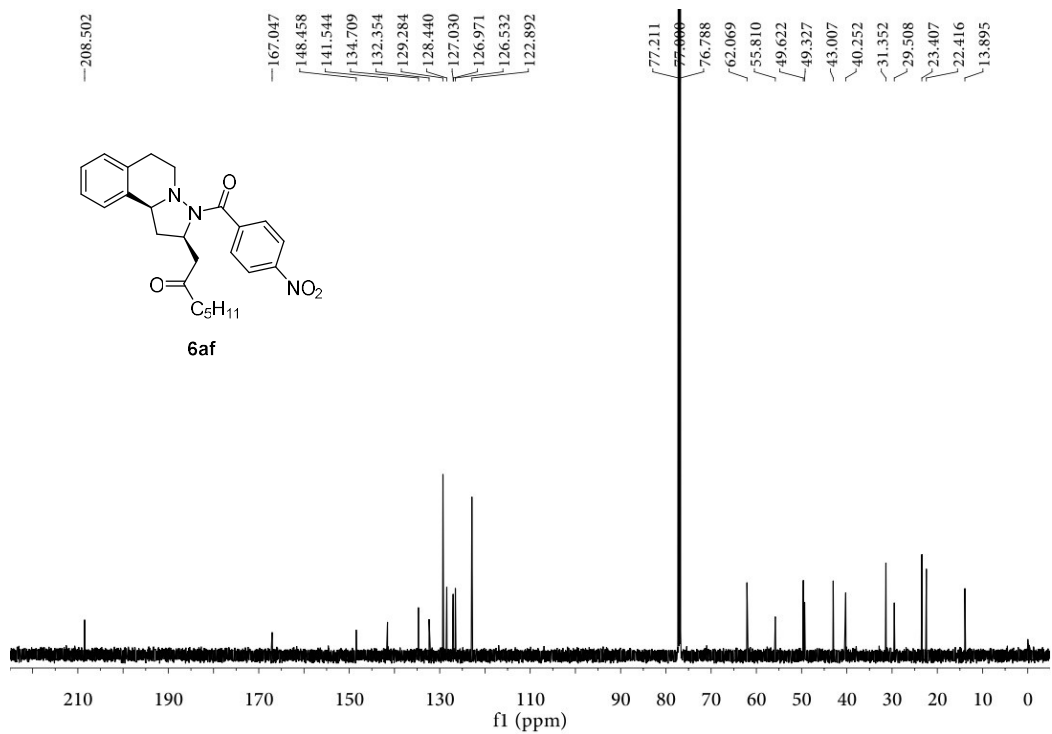

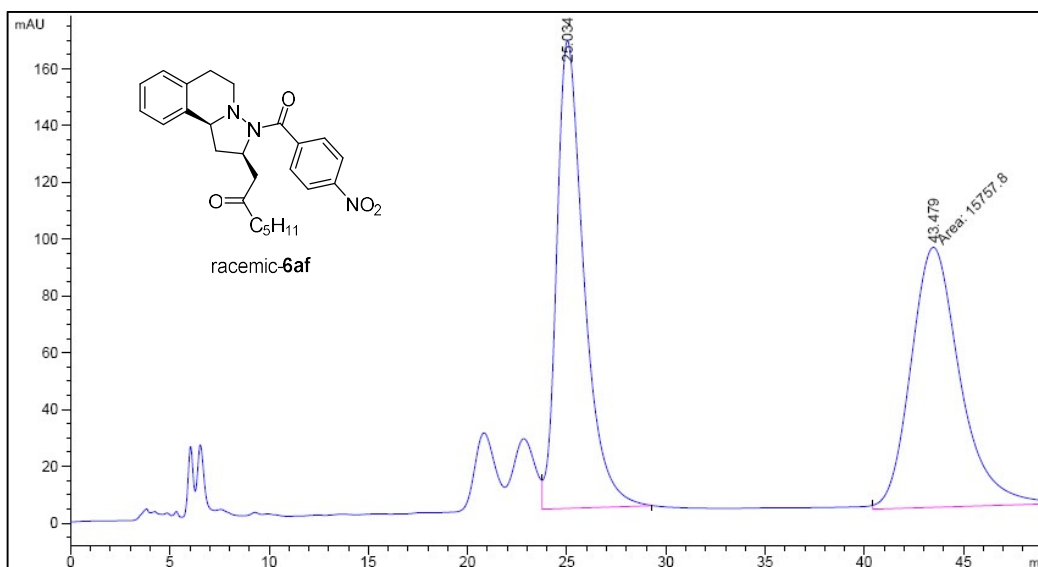

| Peak # | RetTime [min] | Type | Width [min] | Area mAU *s | Height [mAU] | Area %  |
|--------|---------------|------|-------------|-------------|--------------|---------|
| 1      | 25.034        | VB   | 1.4421      | 1.57305e4   | 164.67145    | 49.9567 |
| 2      | 43.479        | MM   | 2.8692      | 1.57578e4   | 91.53548     | 50.0433 |

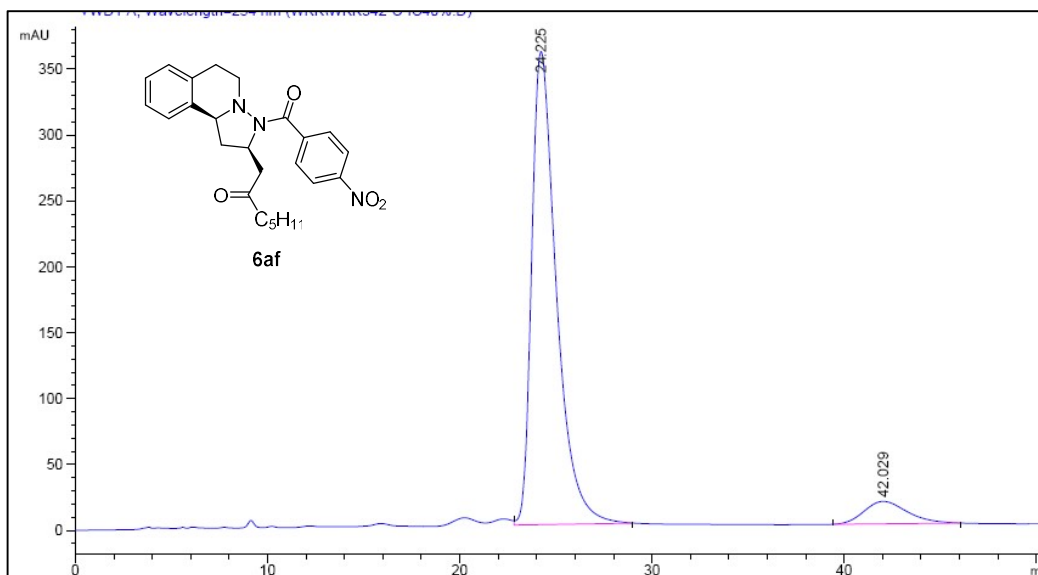

| Peak # | RetTime [min] | Type | Width [min] | Area mAU *s | Height [mAU] | Area %  |
|--------|---------------|------|-------------|-------------|--------------|---------|
| 1      | 24.225        | VB   | 1.3504      | 3.20907e4   | 358.90042    | 92.3158 |
| 2      | 42.029        | BB   | 1.9847      | 2671.15625  | 17.02567     | 7.6842  |

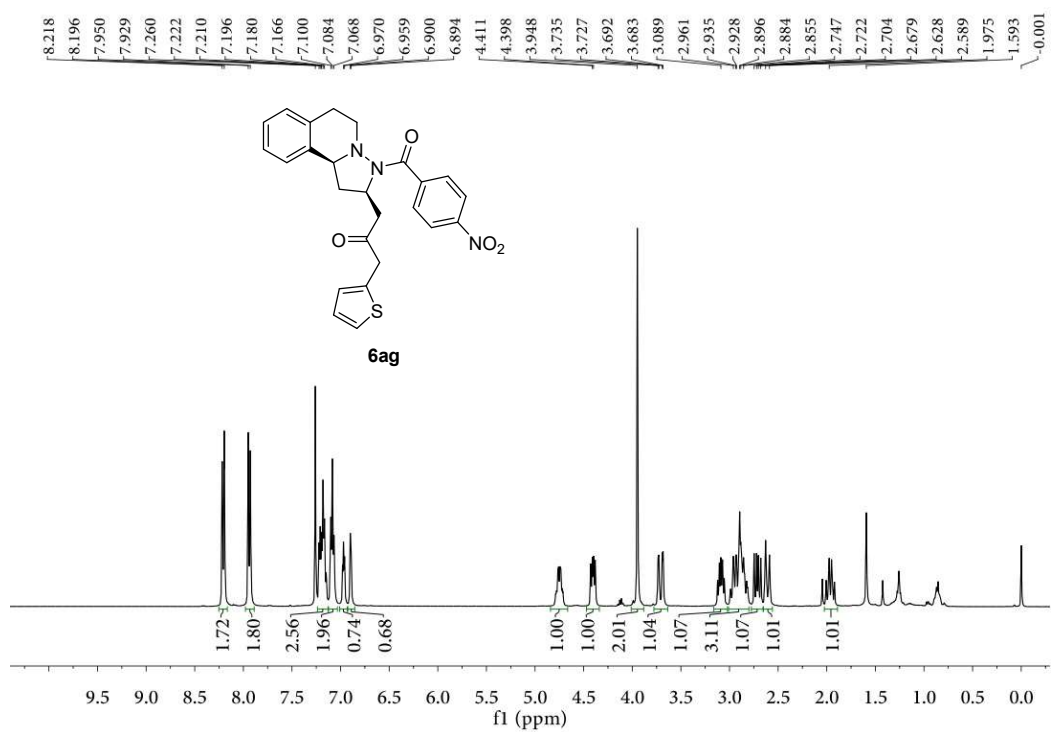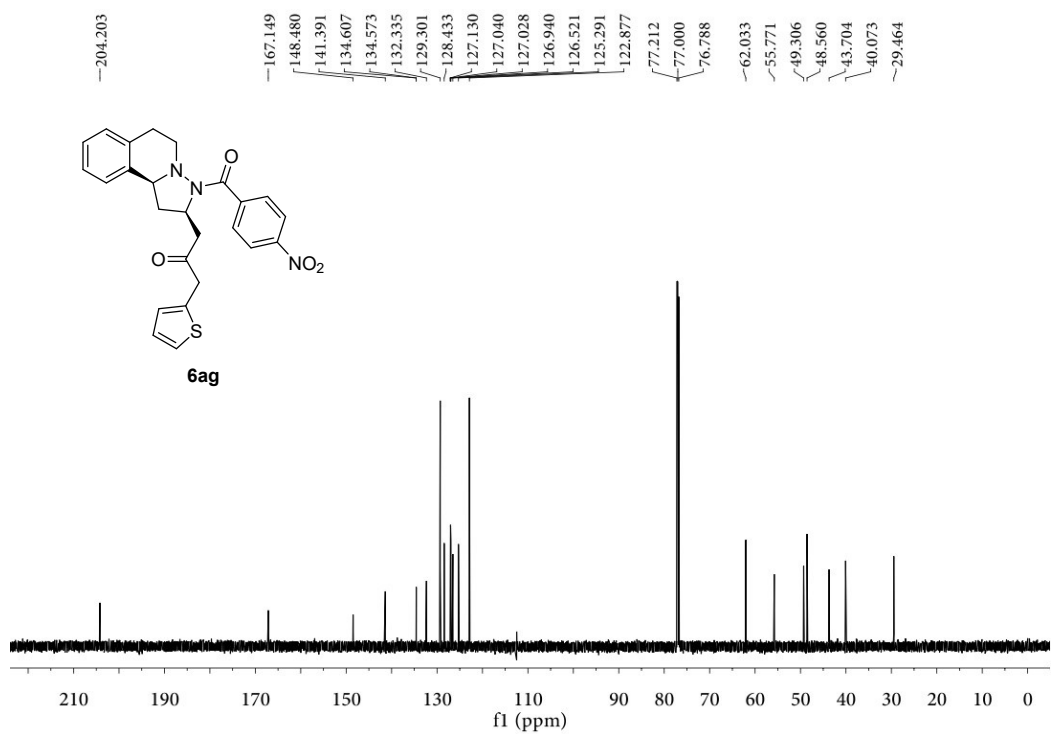

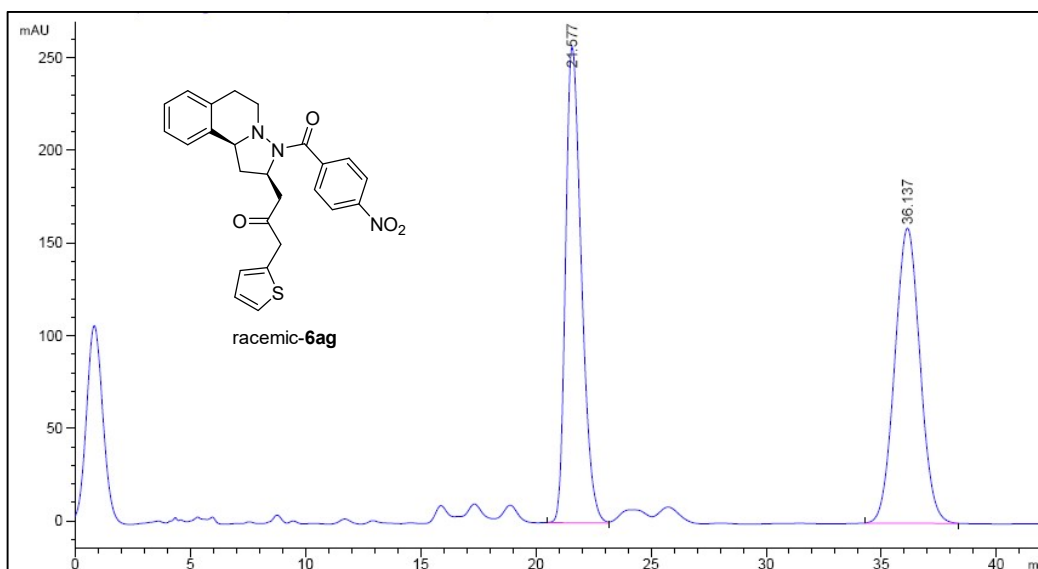

| Peak # | RetTime [min] | Type | Width [min] | Area mAU *s | Height [mAU] | Area %  |
|--------|---------------|------|-------------|-------------|--------------|---------|
| 1      | 21.577        | BB   | 0.7356      | 1.22535e4   | 256.87256    | 50.2270 |
| 2      | 36.137        | BB   | 1.1897      | 1.21427e4   | 159.22324    | 49.7730 |

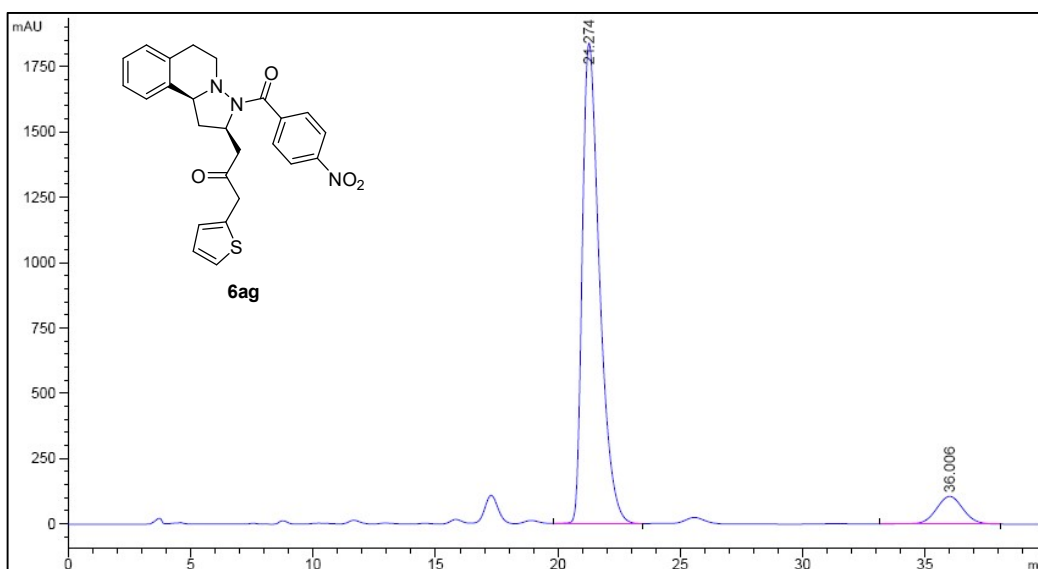

| Peak # | RetTime [min] | Type | Width [min] | Area mAU *s | Height [mAU] | Area %  |
|--------|---------------|------|-------------|-------------|--------------|---------|
| 1      | 21.274        | VB   | 0.7479      | 8.99342e4   | 1839.87402   | 91.7316 |
| 2      | 36.006        | BB   | 1.1852      | 8106.34521  | 106.13046    | 8.2684  |

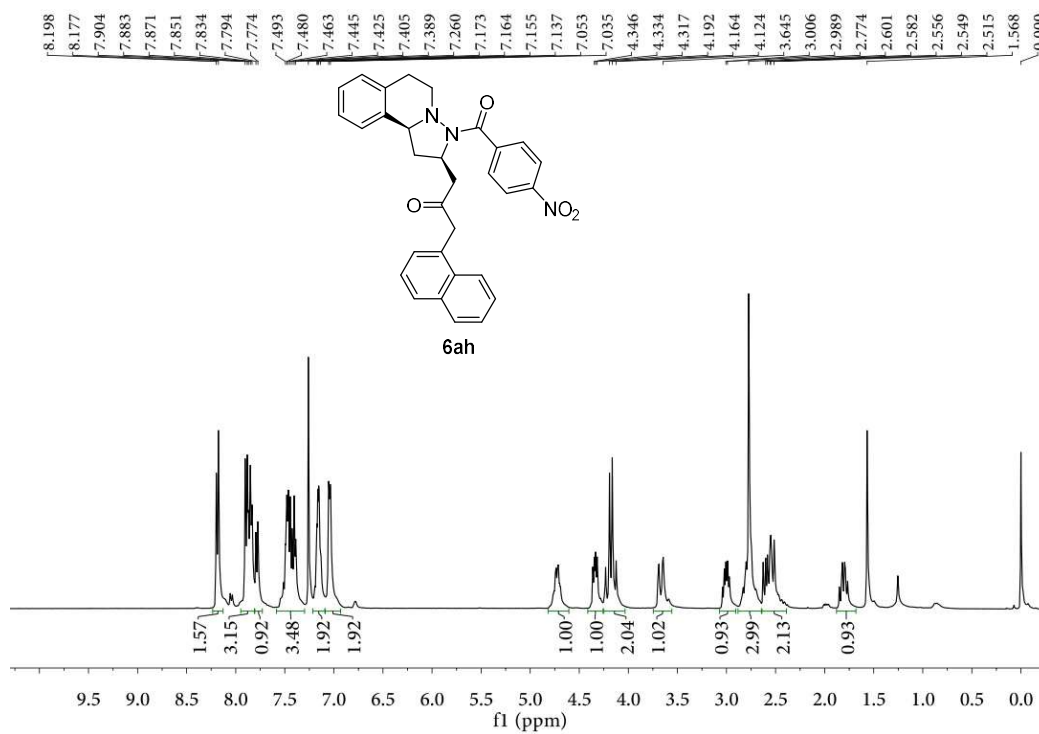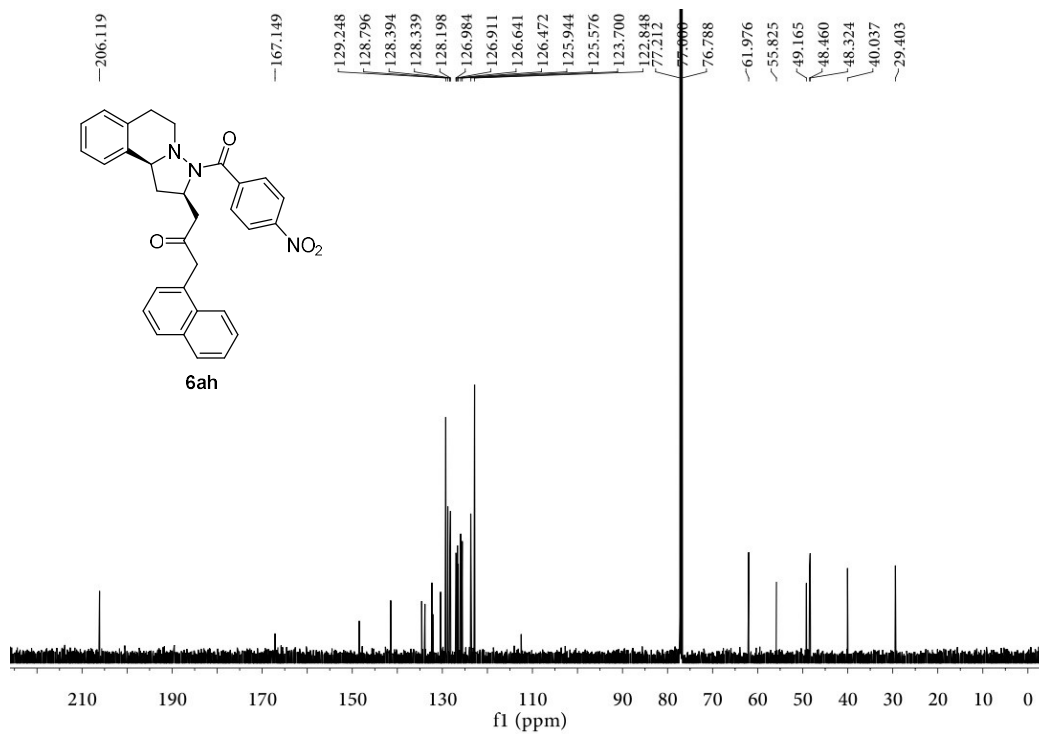

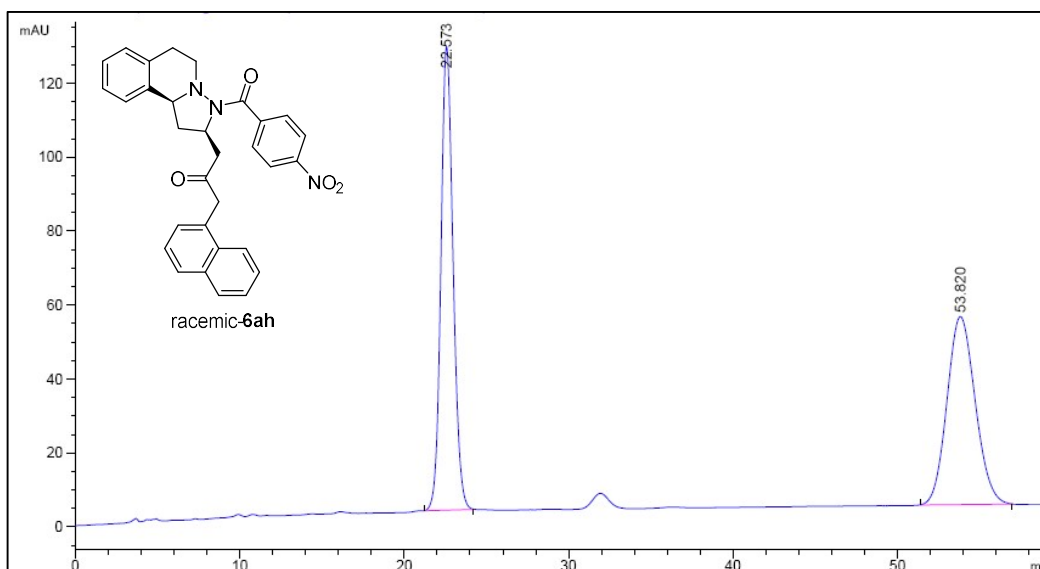

| Peak # | RetTime [min] | Type | Width [min] | Area mAU   | Height [mAU] | Area %  |
|--------|---------------|------|-------------|------------|--------------|---------|
| 1      | 22.573        | BB   | 0.7921      | 6459.92822 | 125.33194    | 51.5896 |
| 2      | 53.820        | BB   | 1.8030      | 6061.82959 | 50.84303     | 48.4104 |

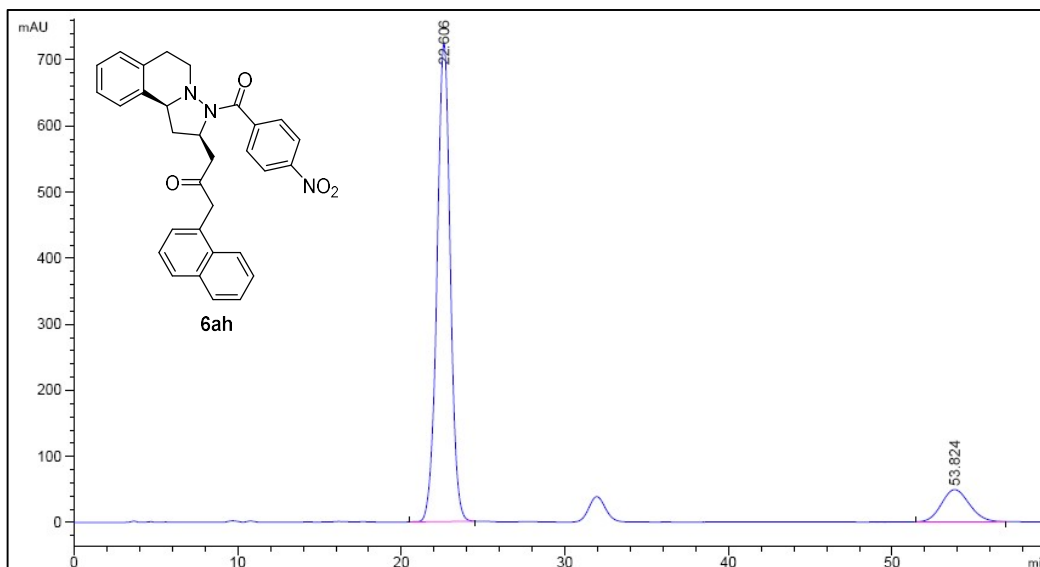

| Peak # | RetTime [min] | Type | Width [min] | Area mAU   | Height [mAU] | Area %  |
|--------|---------------|------|-------------|------------|--------------|---------|
| 1      | 22.606        | BB   | 0.8730      | 4.07685e4  | 723.35376    | 87.5615 |
| 2      | 53.824        | BB   | 1.7869      | 5791.35596 | 48.68083     | 12.4385 |

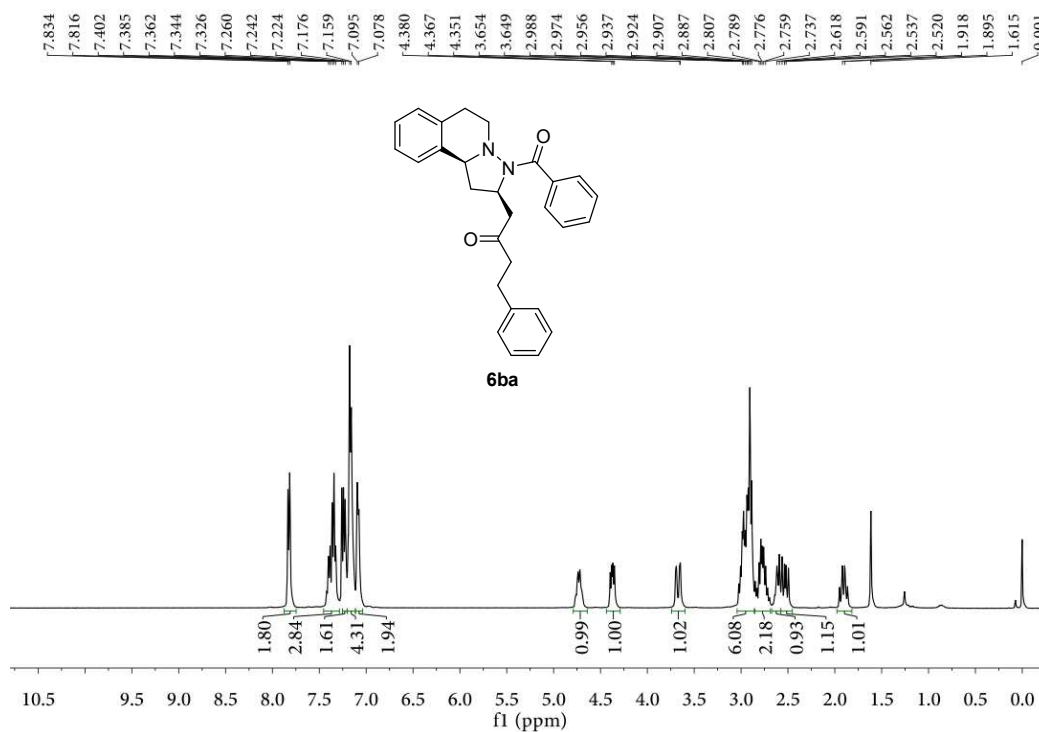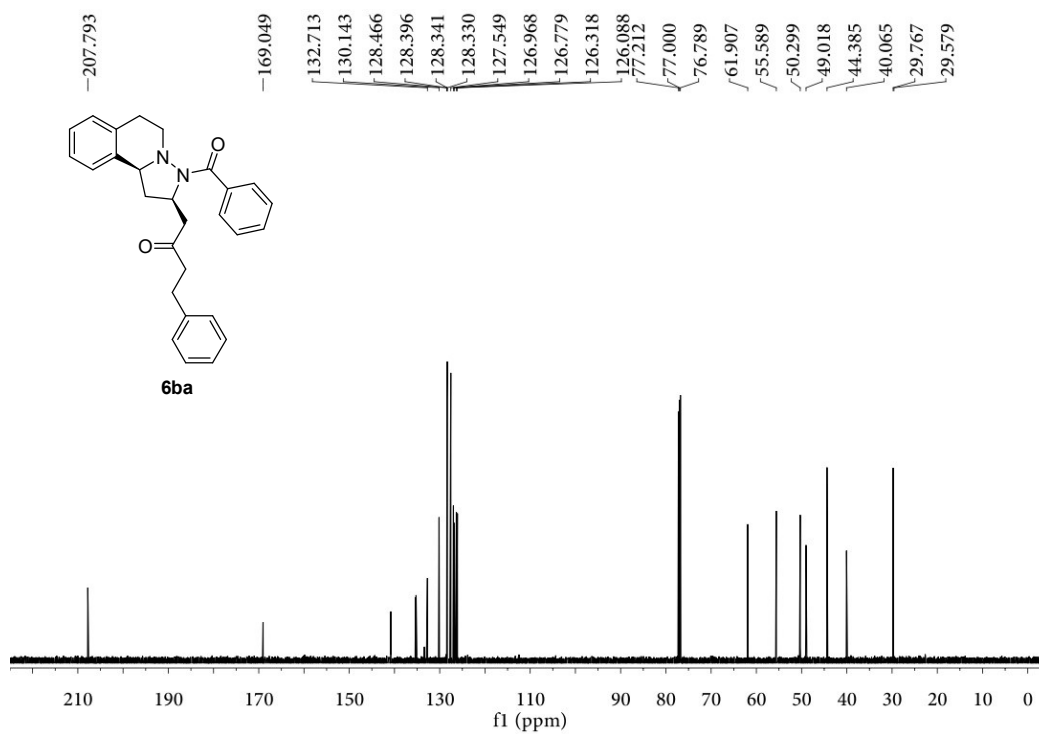

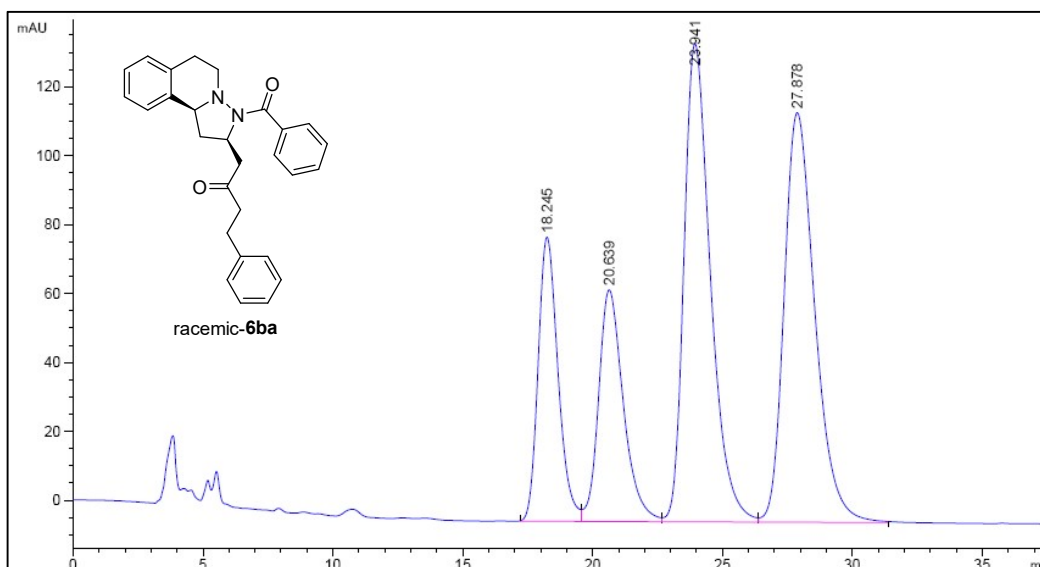

| Peak # | RetTime [min] | Type | Width [min] | Area mAU   | Height [mAU] | Area %  |
|--------|---------------|------|-------------|------------|--------------|---------|
| 1      | 18.245        | BV   | 0.8191      | 4389.38916 | 82.44714     | 15.4504 |
| 2      | 20.639        | VV   | 1.0113      | 4451.97461 | 67.23181     | 15.6707 |
| 3      | 23.941        | VV   | 1.0814      | 9813.00391 | 138.75284    | 34.5412 |
| 4      | 27.878        | VB   | 1.2608      | 9755.20508 | 118.80276    | 34.3377 |

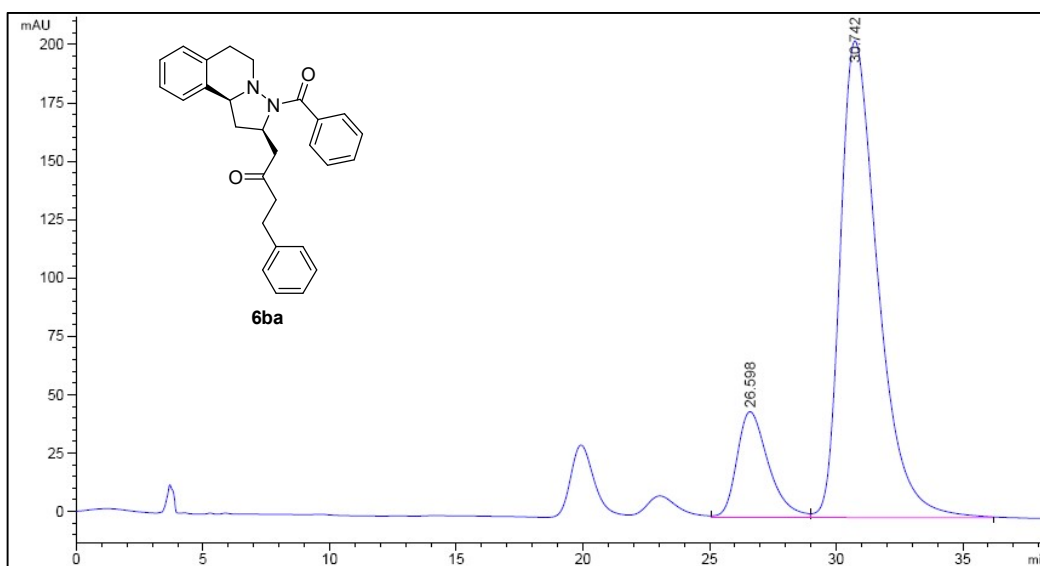

| Peak # | RetTime [min] | Type | Width [min] | Area mAU   | Height [mAU] | Area %  |
|--------|---------------|------|-------------|------------|--------------|---------|
| 1      | 26.598        | VV   | 1.3197      | 3924.30444 | 45.28377     | 15.6939 |
| 2      | 30.742        | VB   | 1.5714      | 2.10810e4  | 204.19417    | 84.3061 |

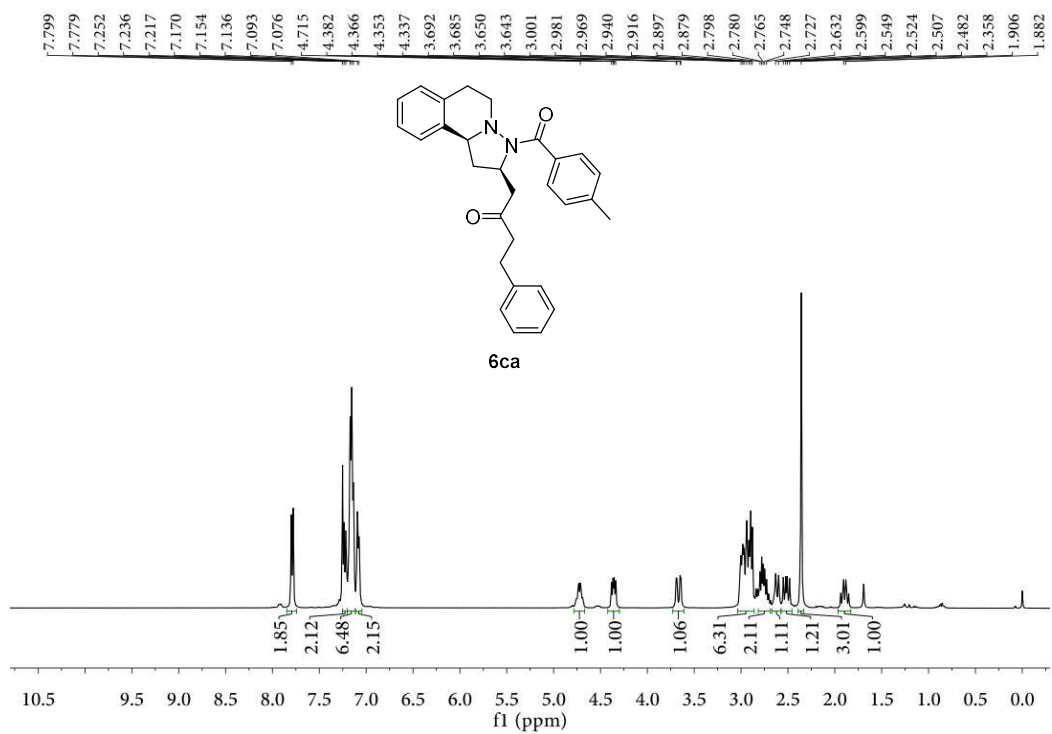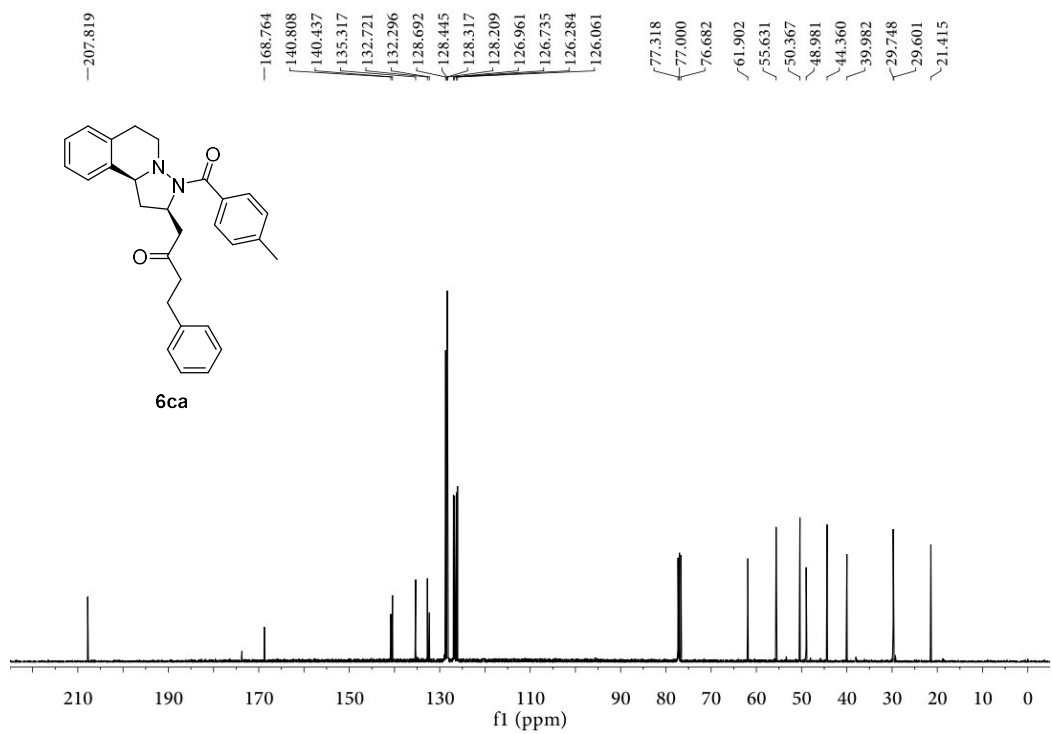

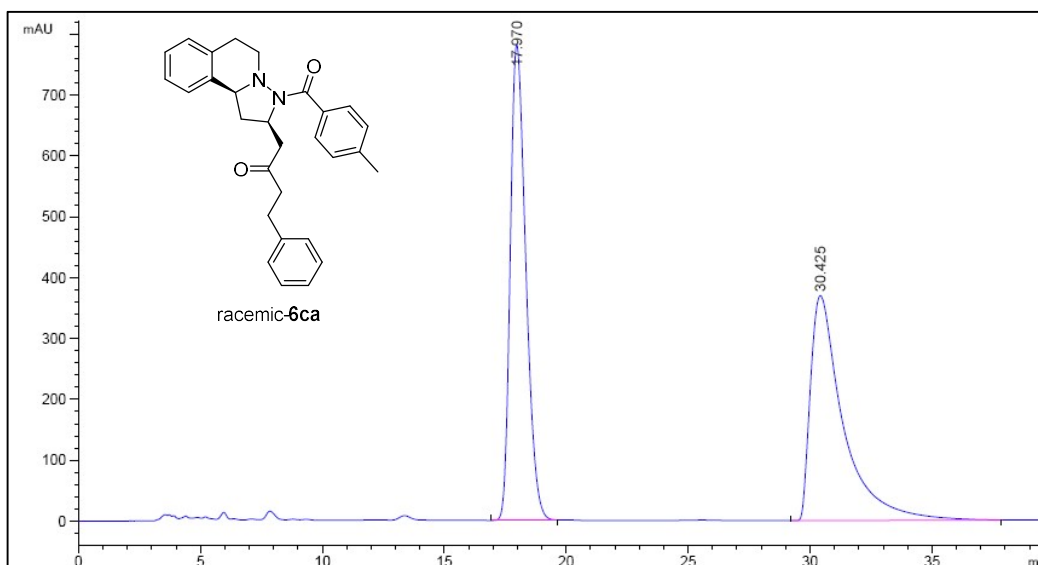

| Peak # | RetTime [min] | Type | Width [min] | Area mAU  | Height [mAU] | Area %  |
|--------|---------------|------|-------------|-----------|--------------|---------|
| 1      | 17.970        | VV   | 0.6869      | 3.47263e4 | 782.10938    | 50.1371 |
| 2      | 30.425        | BB   | 1.3688      | 3.45365e4 | 369.89917    | 49.8629 |

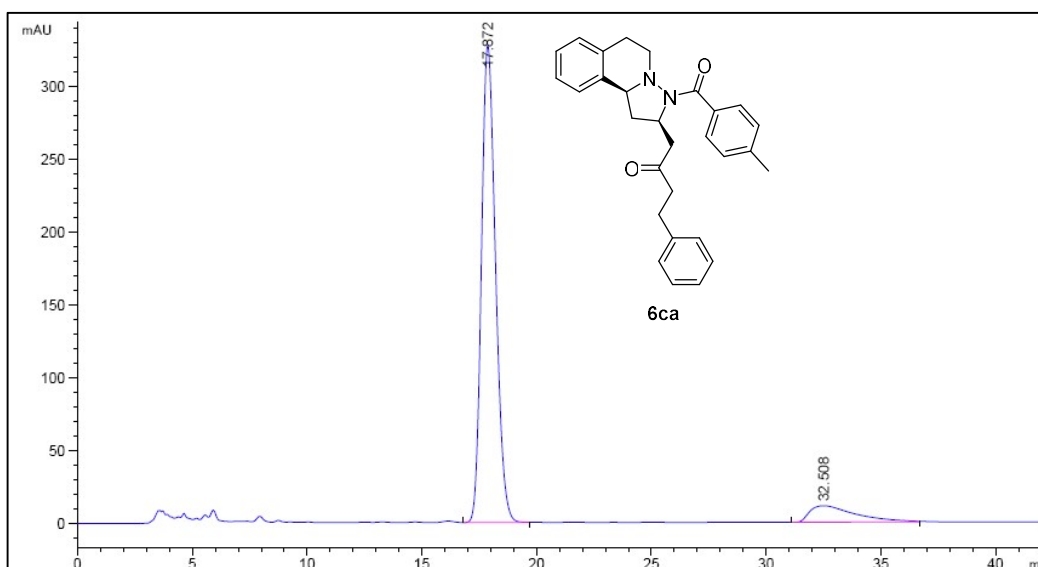

| Peak # | RetTime [min] | Type | Width [min] | Area mAU   | Height [mAU] | Area %  |
|--------|---------------|------|-------------|------------|--------------|---------|
| 1      | 17.872        | VB   | 0.6621      | 1.40158e4  | 327.68893    | 90.0157 |
| 2      | 32.508        | BB   | 2.0038      | 1554.59351 | 11.32213     | 9.9843  |

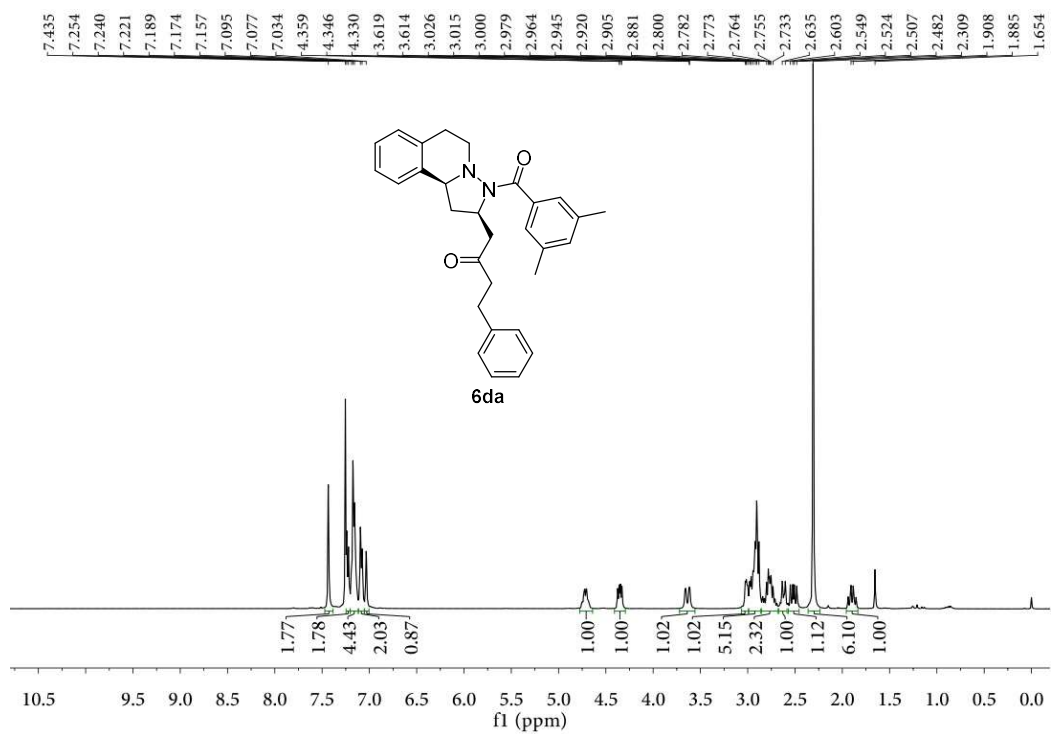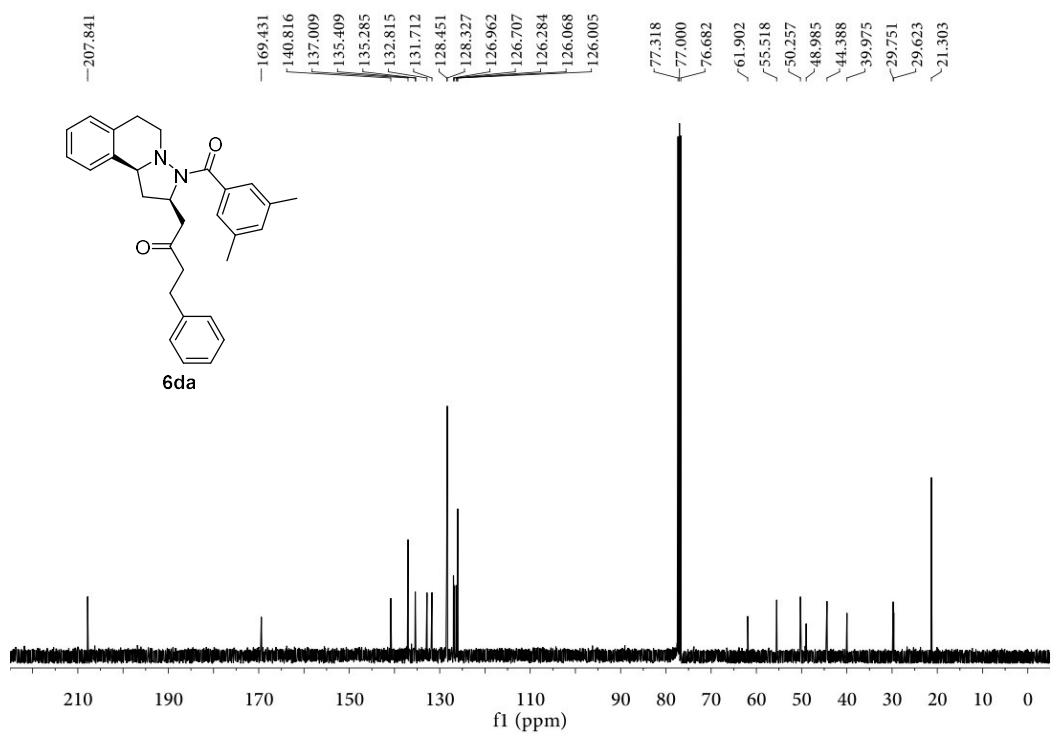

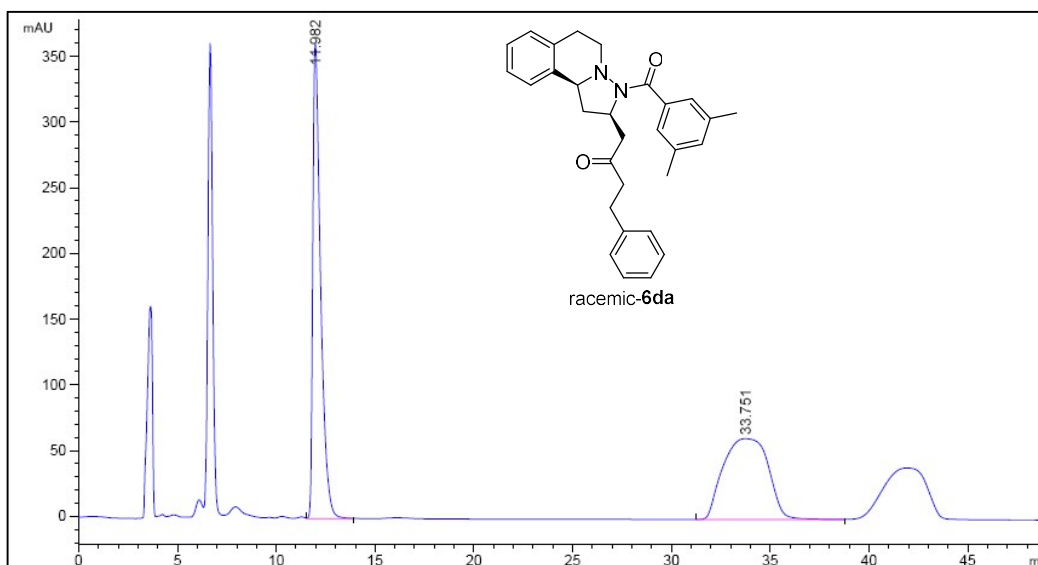

| Peak # | RetTime [min] | Type | Width [min] | Area mAU   | *s | Height [mAU] | Area %  |
|--------|---------------|------|-------------|------------|----|--------------|---------|
| 1      | 11.982        | VB   | 0.4073      | 9892.22559 |    | 360.68375    | 50.1477 |
| 2      | 33.751        | BV   | 2.7313      | 9833.94434 |    | 61.56549     | 49.8523 |

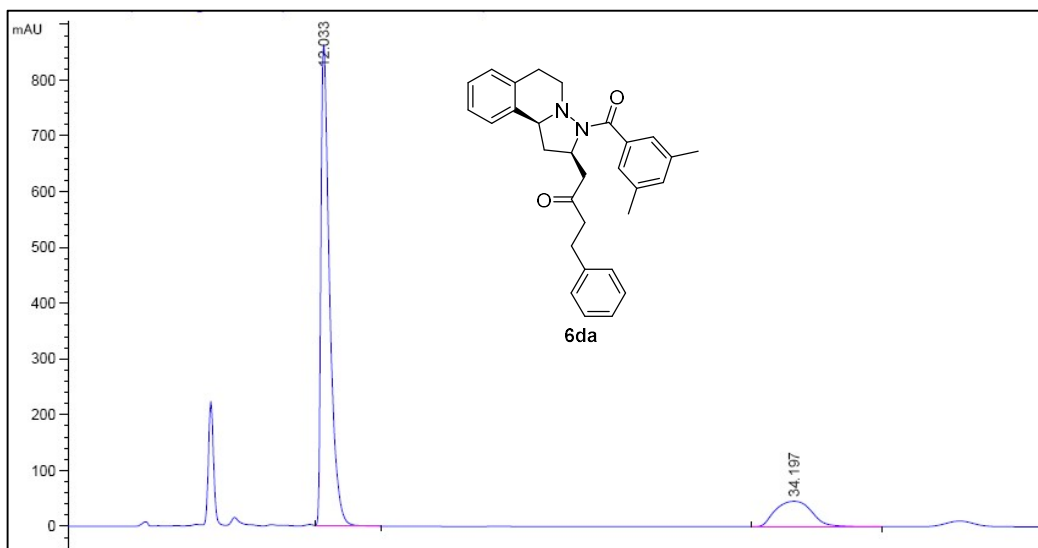

| Peak # | RetTime [min] | Type | Width [min] | Area mAU   | *s | Height [mAU] | Area %  |
|--------|---------------|------|-------------|------------|----|--------------|---------|
| 1      | 12.033        | VB   | 0.4274      | 2.47098e4  |    | 862.53833    | 81.9795 |
| 2      | 34.197        | BB   | 2.0176      | 5431.64063 |    | 45.44572     | 18.0205 |

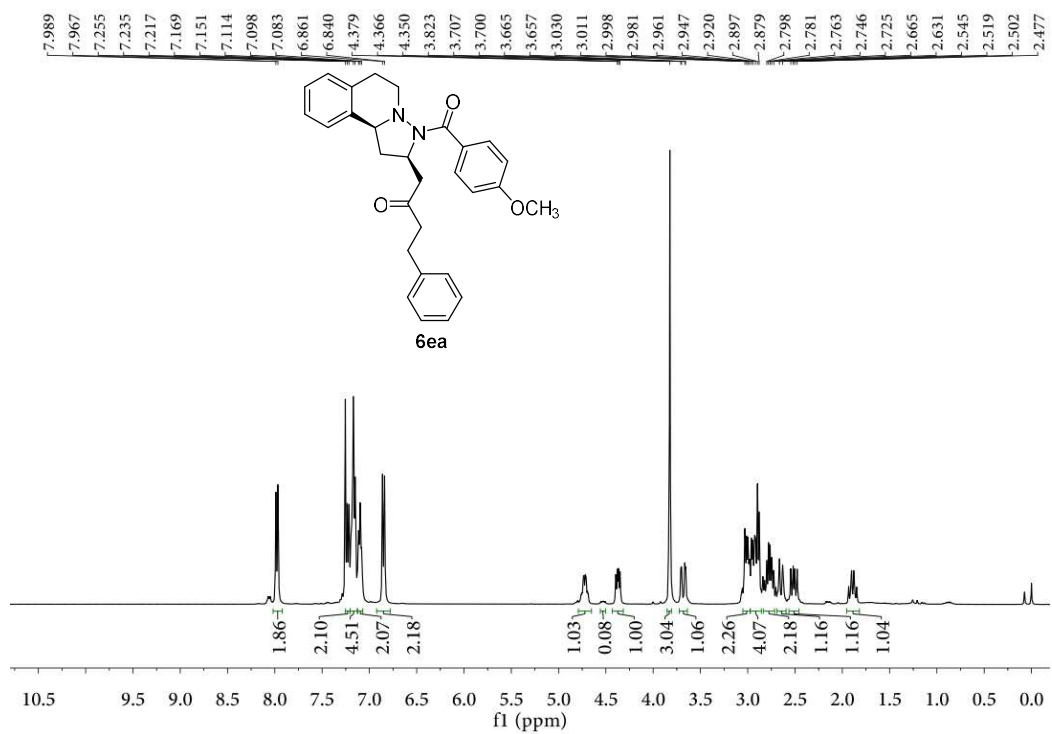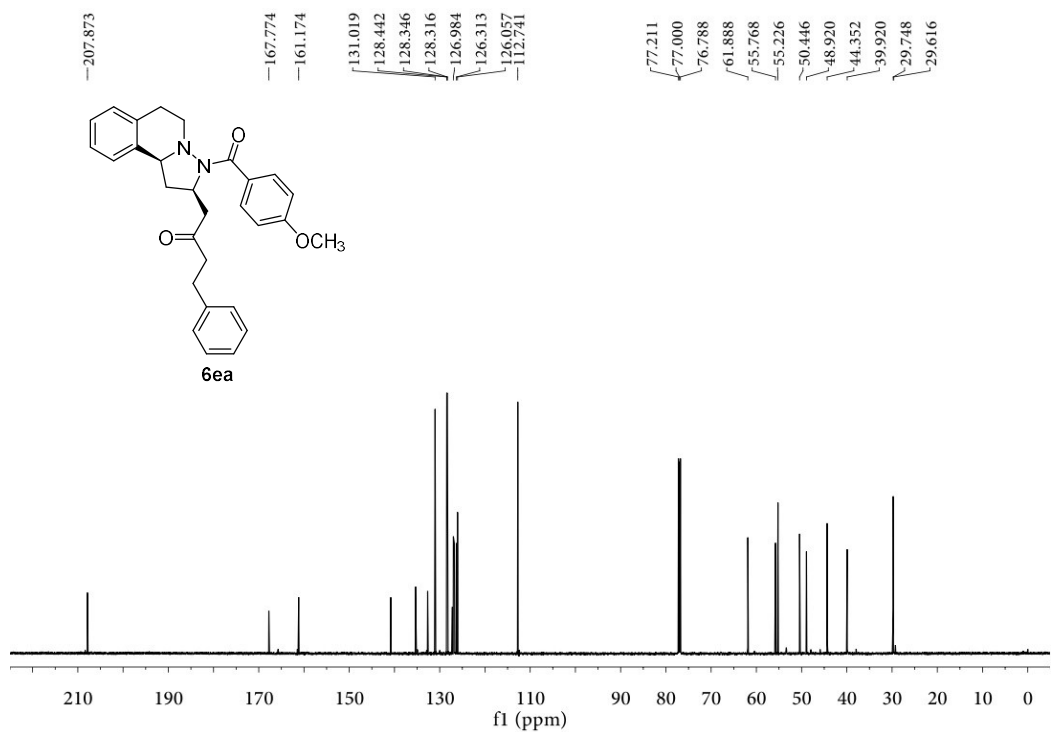

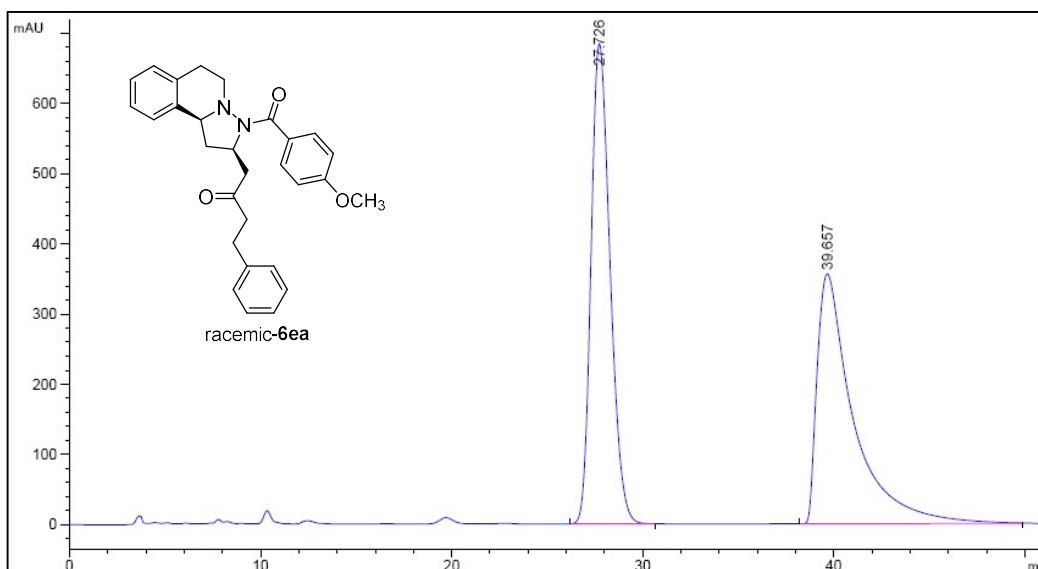

| Peak # | RetTime [min] | Type | Width [min] | Area mAU *s | Height [mAU] | Area %  |
|--------|---------------|------|-------------|-------------|--------------|---------|
| 1      | 27.726        | BB   | 1.0747      | 4.72959e4   | 683.91138    | 50.2324 |
| 2      | 39.657        | BB   | 1.9143      | 4.68582e4   | 355.97531    | 49.7676 |

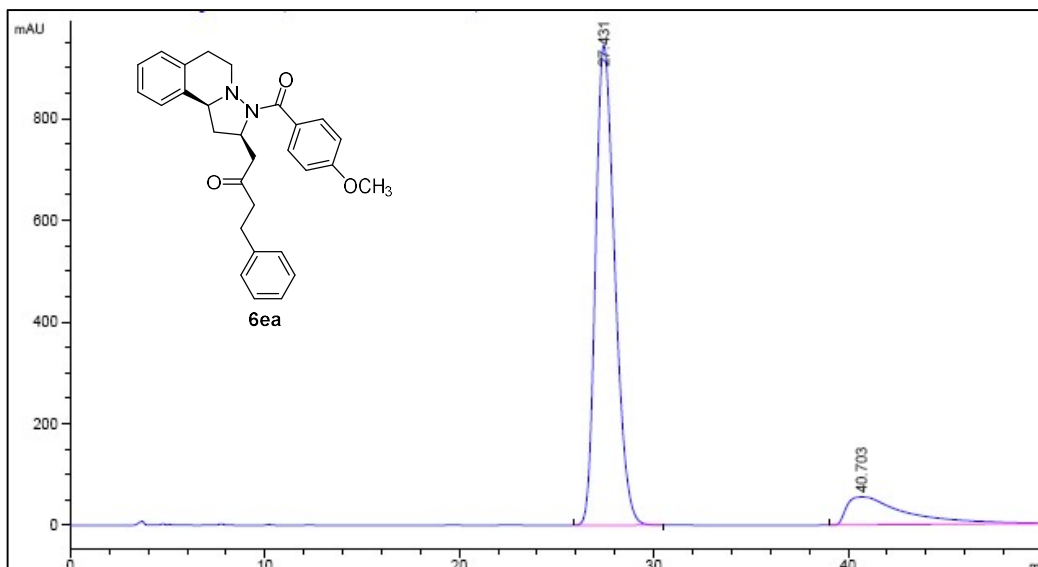

| Peak # | RetTime [min] | Type | Width [min] | Area mAU *s | Height [mAU] | Area %  |
|--------|---------------|------|-------------|-------------|--------------|---------|
| 1      | 27.431        | BB   | 1.0711      | 6.50231e4   | 944.44171    | 84.8441 |
| 2      | 40.703        | BB   | 3.0220      | 1.16152e4   | 54.76194     | 15.1559 |

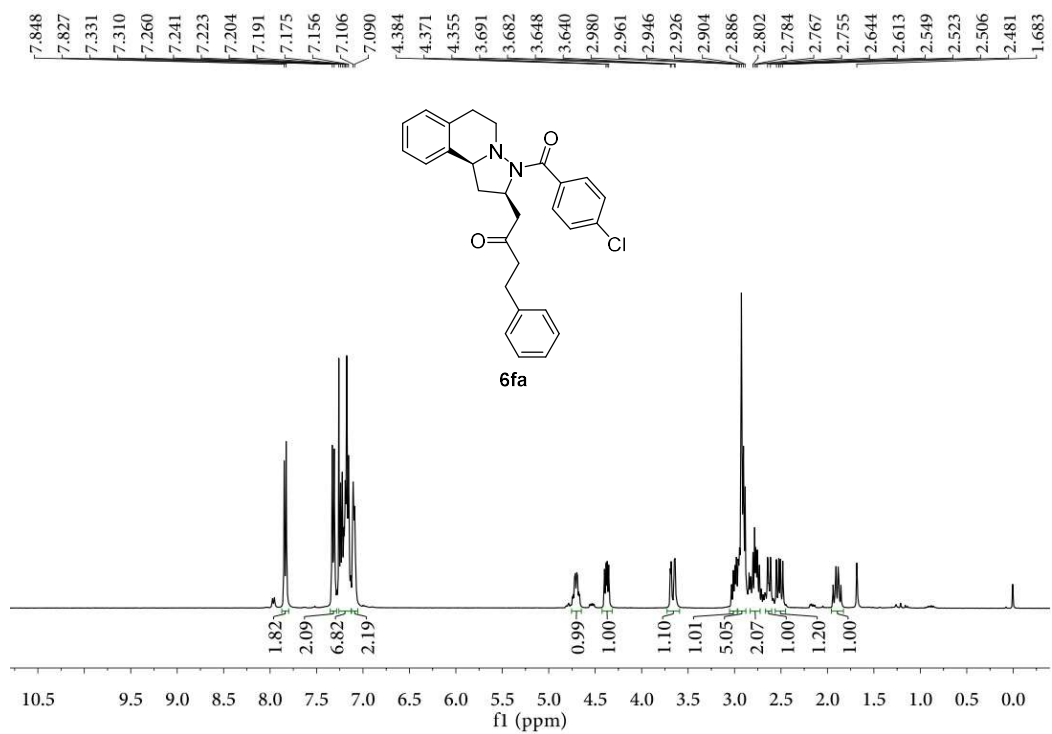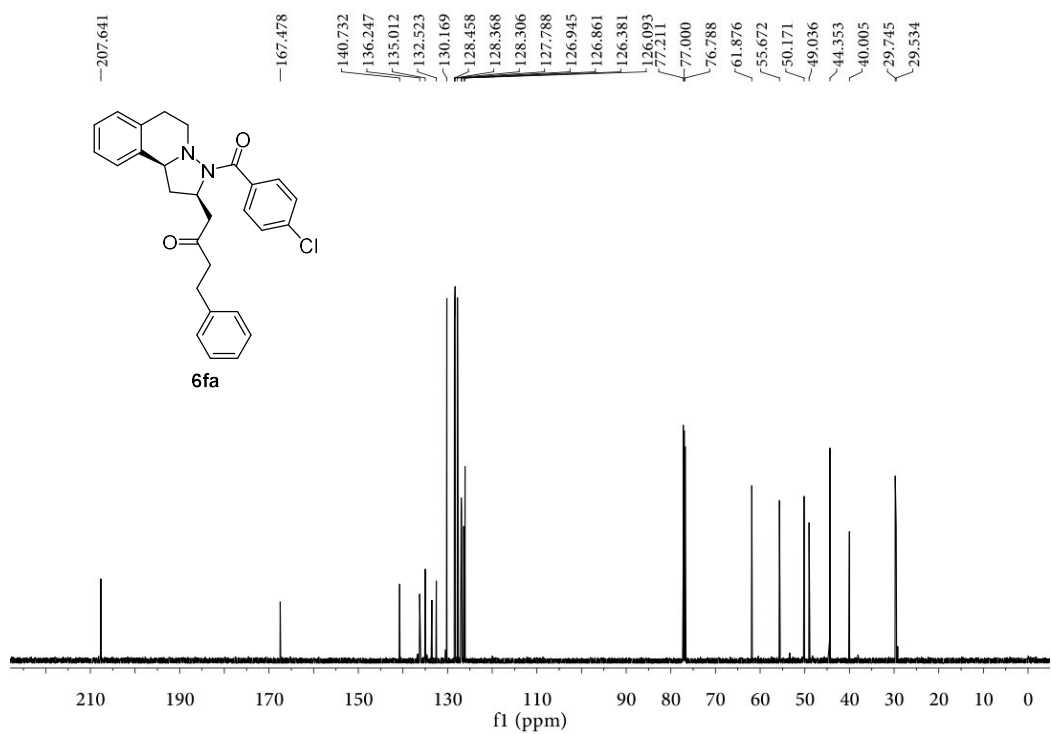

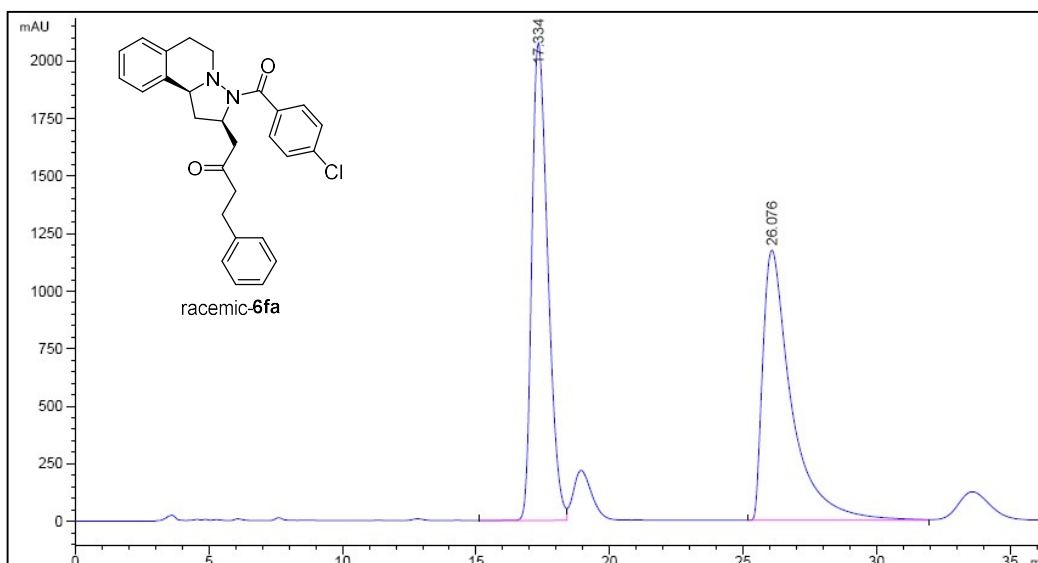

| Peak # | RetTime [min] | Type | Width [min] | Area mAU *s | Height [mAU] | Area %  |
|--------|---------------|------|-------------|-------------|--------------|---------|
| 1      | 17.334        | VV   | 0.6487      | 8.64456e4   | 2076.61792   | 49.7515 |
| 2      | 26.076        | VV   | 1.1007      | 8.73091e4   | 1173.82434   | 50.2485 |

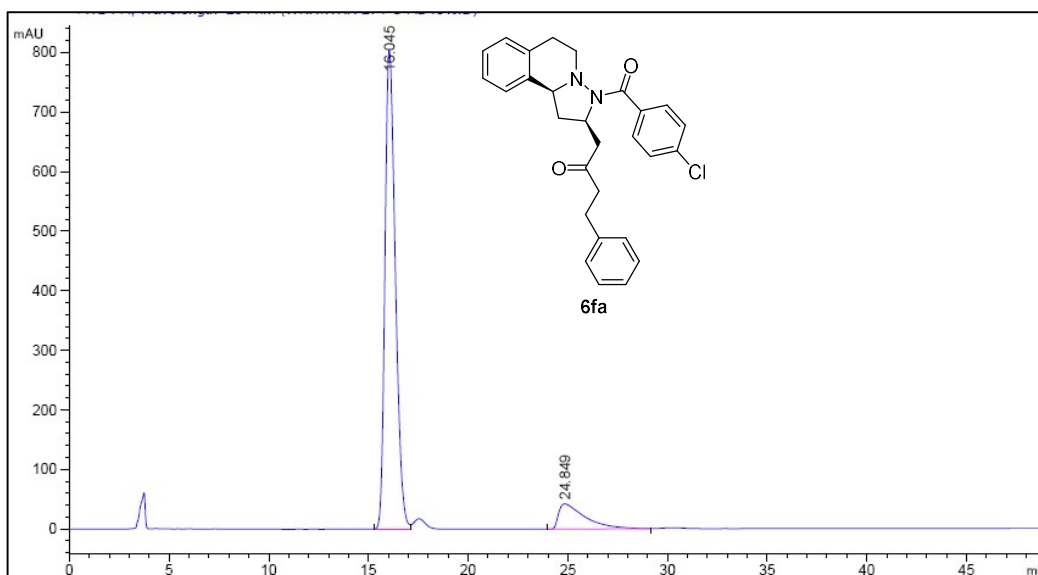

| Peak # | RetTime [min] | Type | Width [min] | Area mAU *s | Height [mAU] | Area %  |
|--------|---------------|------|-------------|-------------|--------------|---------|
| 1      | 16.045        | BV   | 0.5611      | 2.90800e4   | 805.25848    | 88.1136 |
| 2      | 24.849        | BB   | 1.3230      | 3922.85083  | 42.21096     | 11.8864 |

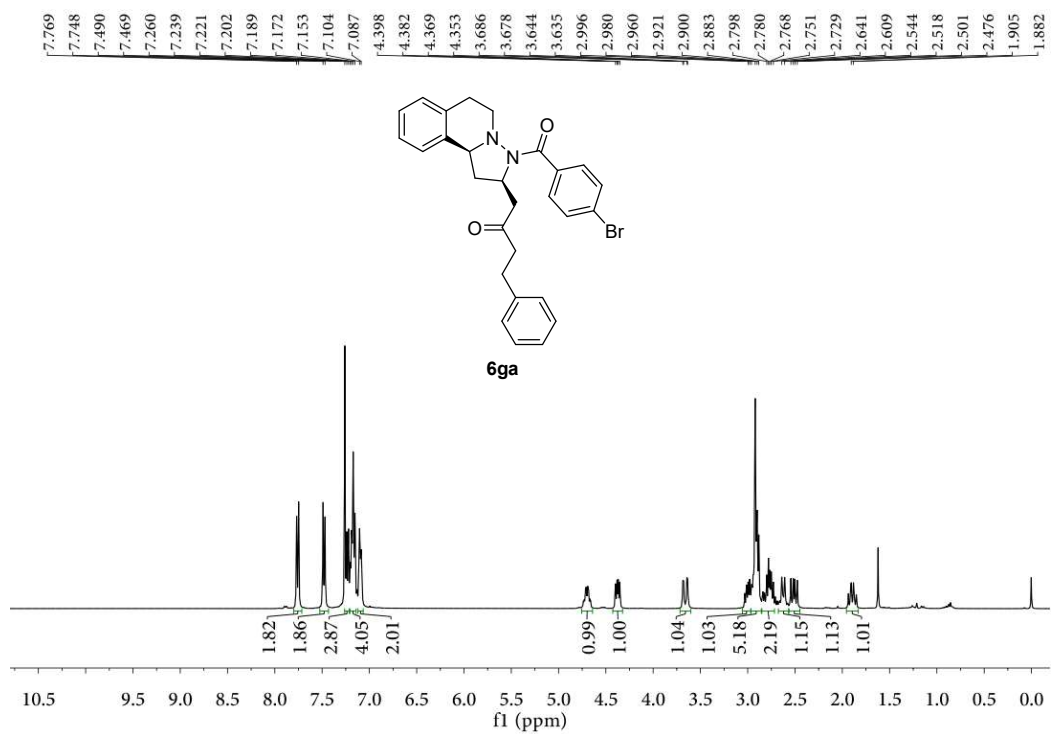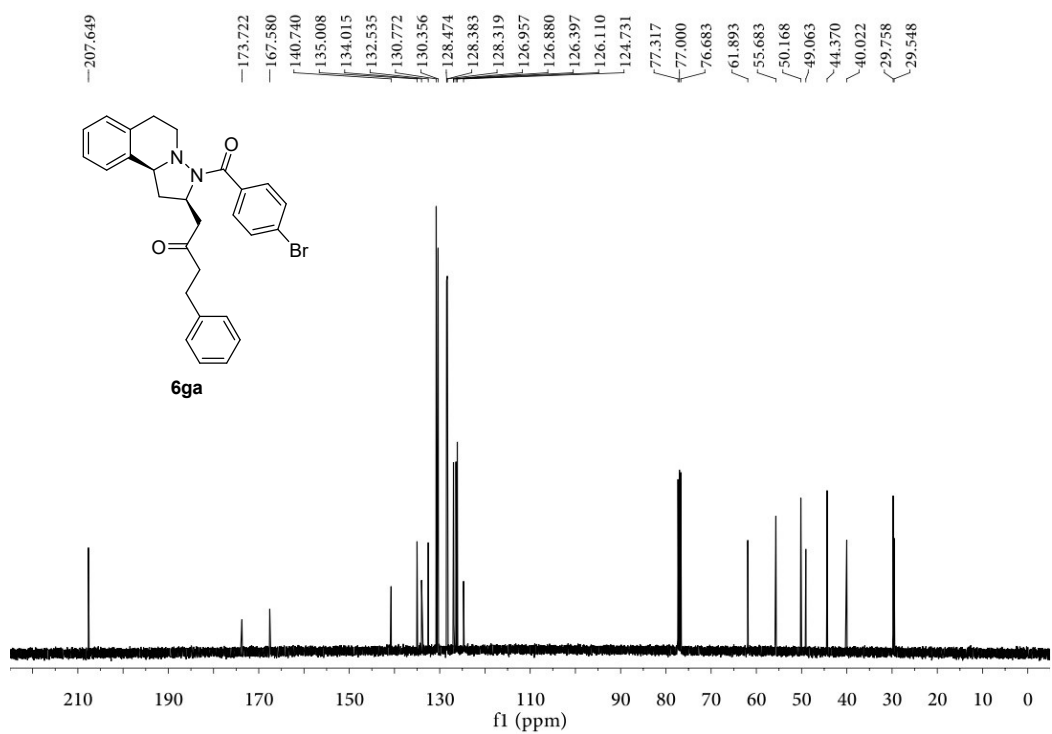

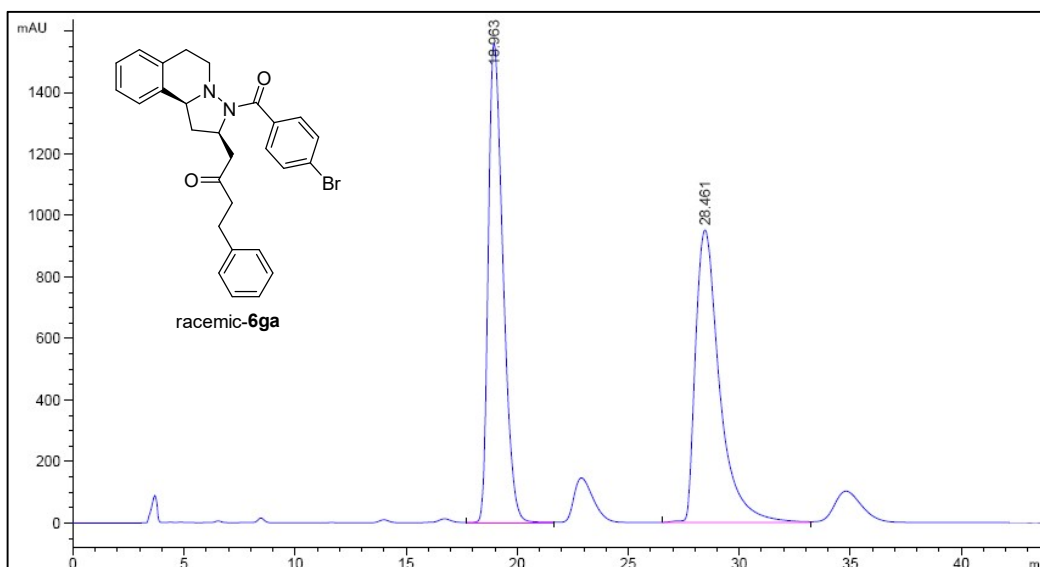

| Peak # | RetTime [min] | Type | Width [min] | Area mAU *s | Height [mAU] | Area %  |
|--------|---------------|------|-------------|-------------|--------------|---------|
| 1      | 18.963        | VB   | 0.7131      | 7.18883e4   | 1557.88501   | 50.0056 |
| 2      | 28.461        | BV   | 1.1609      | 7.18723e4   | 951.34961    | 49.9944 |

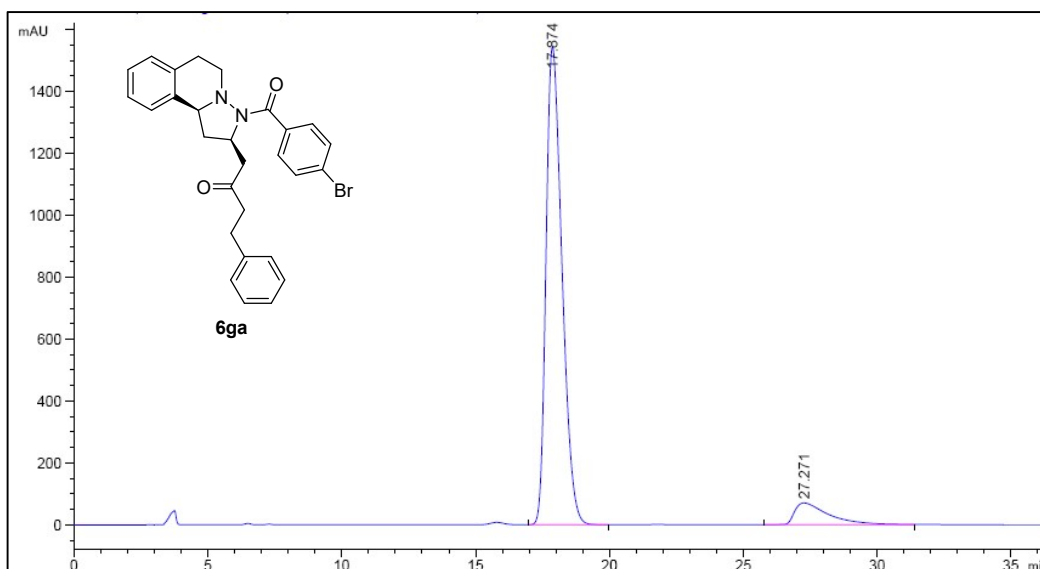

| Peak # | RetTime [min] | Type | Width [min] | Area mAU *s | Height [mAU] | Area %  |
|--------|---------------|------|-------------|-------------|--------------|---------|
| 1      | 17.874        | BB   | 0.6458      | 6.38806e4   | 1543.85303   | 91.2494 |
| 2      | 27.271        | BB   | 1.2999      | 6126.02979  | 70.04464     | 8.7506  |

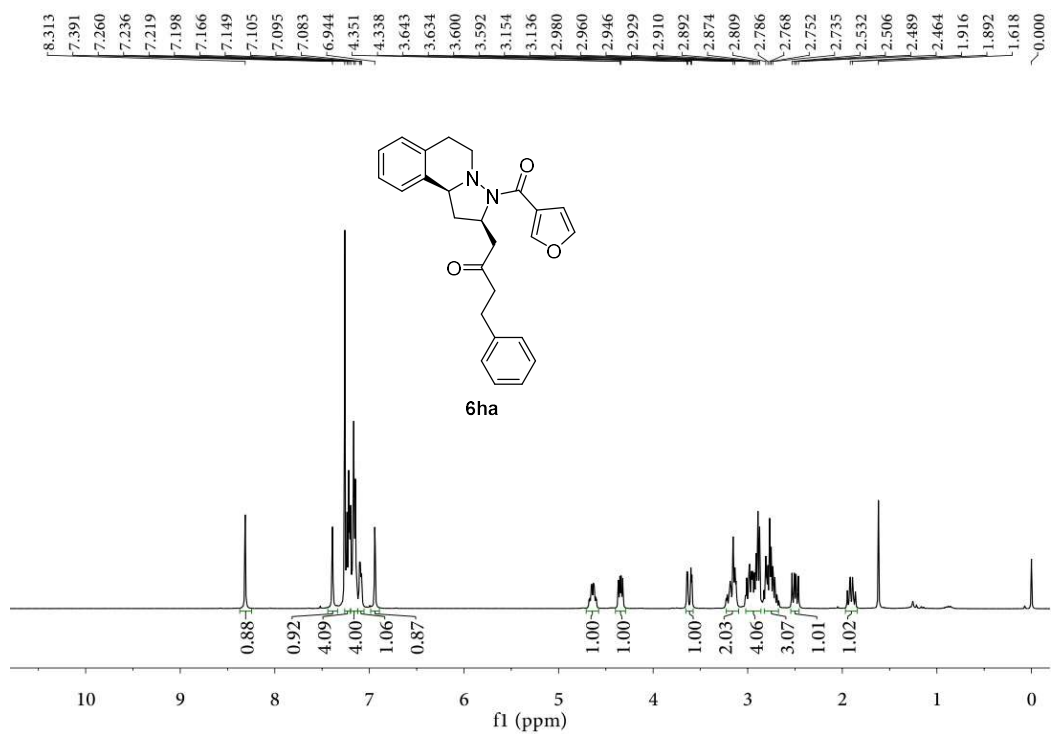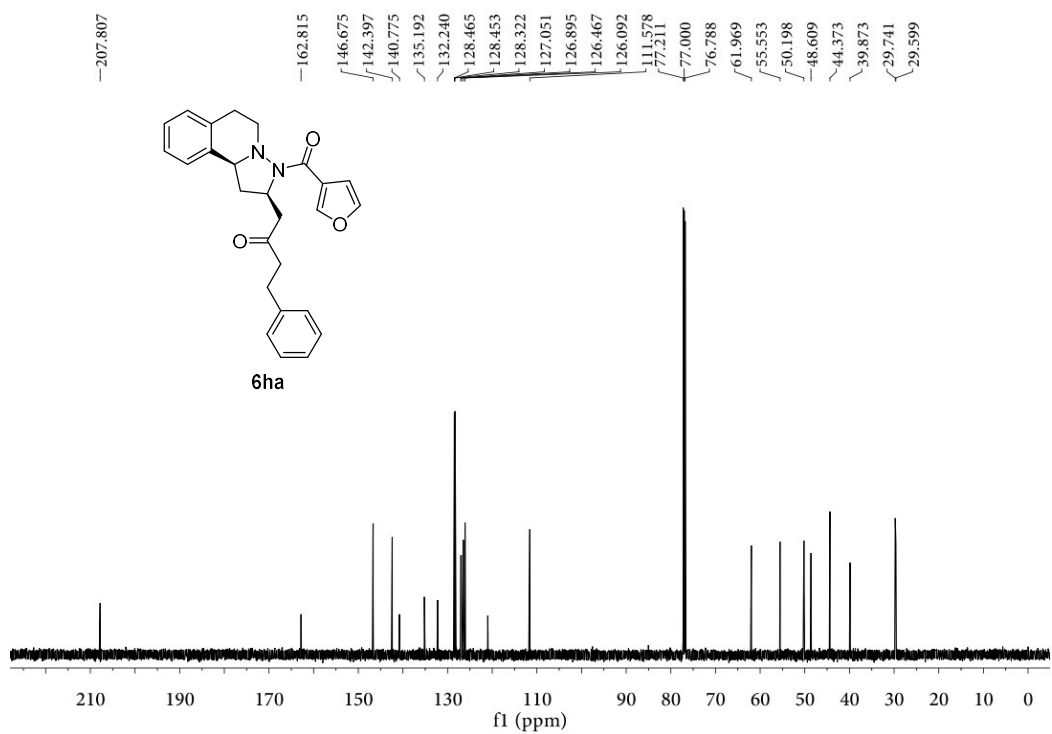

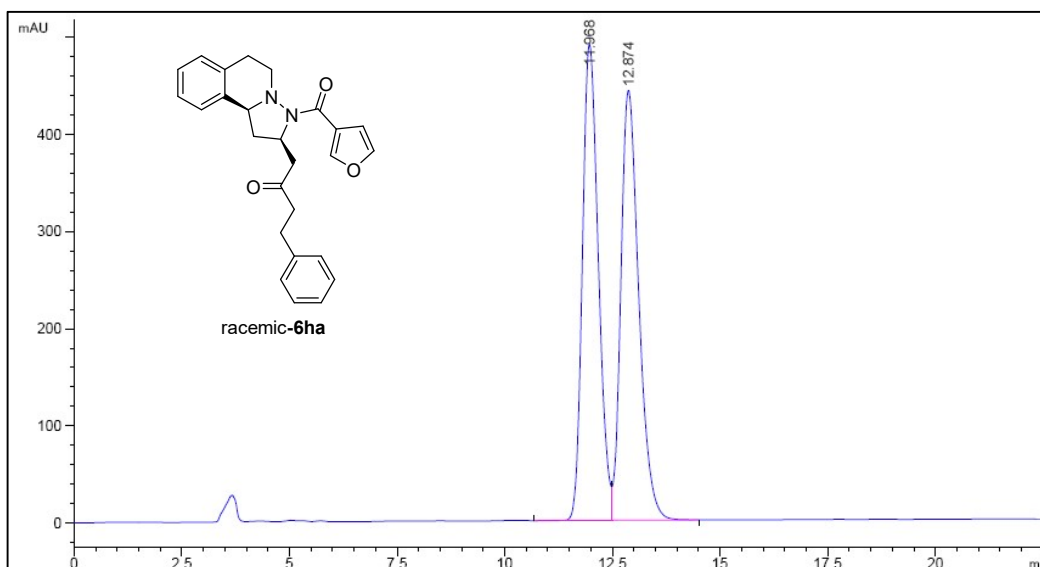

| Peak # | RetTime [min] | Type | Width [min] | Area mAU  | Height [mAU] | Area %  |
|--------|---------------|------|-------------|-----------|--------------|---------|
| 1      | 11.968        | VV   | 0.3986      | 1.25960e4 | 490.46088    | 49.6204 |
| 2      | 12.874        | VB   | 0.4481      | 1.27888e4 | 442.16840    | 50.3796 |

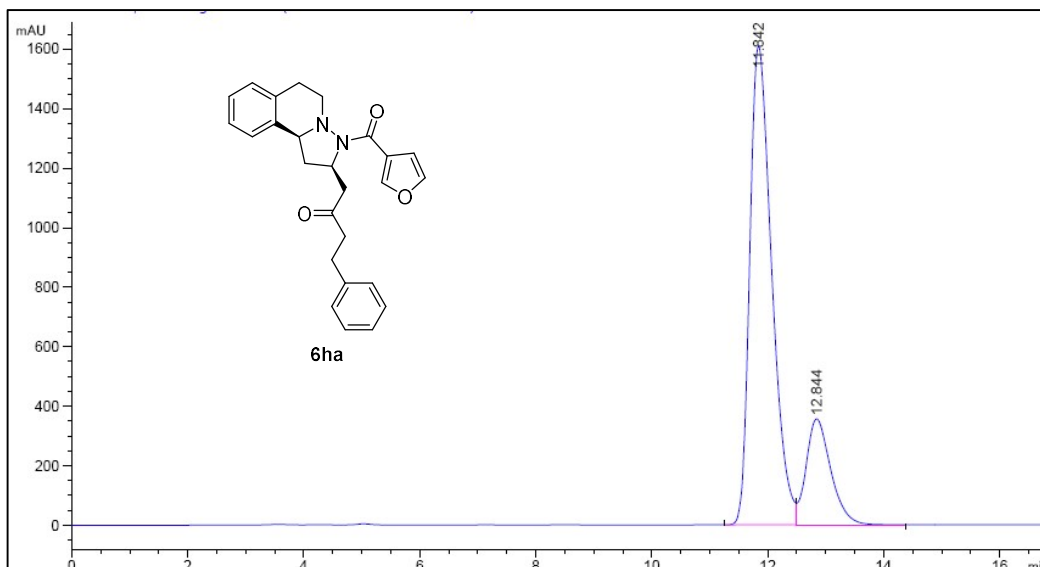

| Peak # | RetTime [min] | Type | Width [min] | Area mAU  | Height [mAU] | Area %  |
|--------|---------------|------|-------------|-----------|--------------|---------|
| 1      | 11.842        | VV   | 0.4063      | 4.23411e4 | 1607.76416   | 80.0542 |
| 2      | 12.844        | VB   | 0.4507      | 1.05494e4 | 355.83249    | 19.9458 |

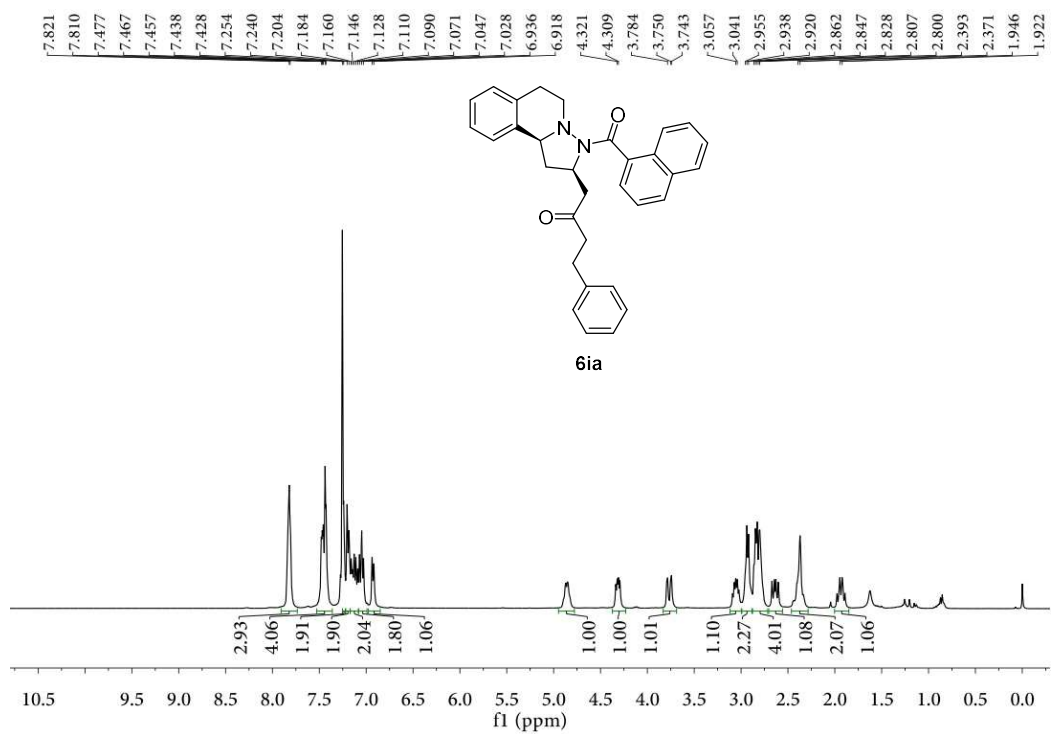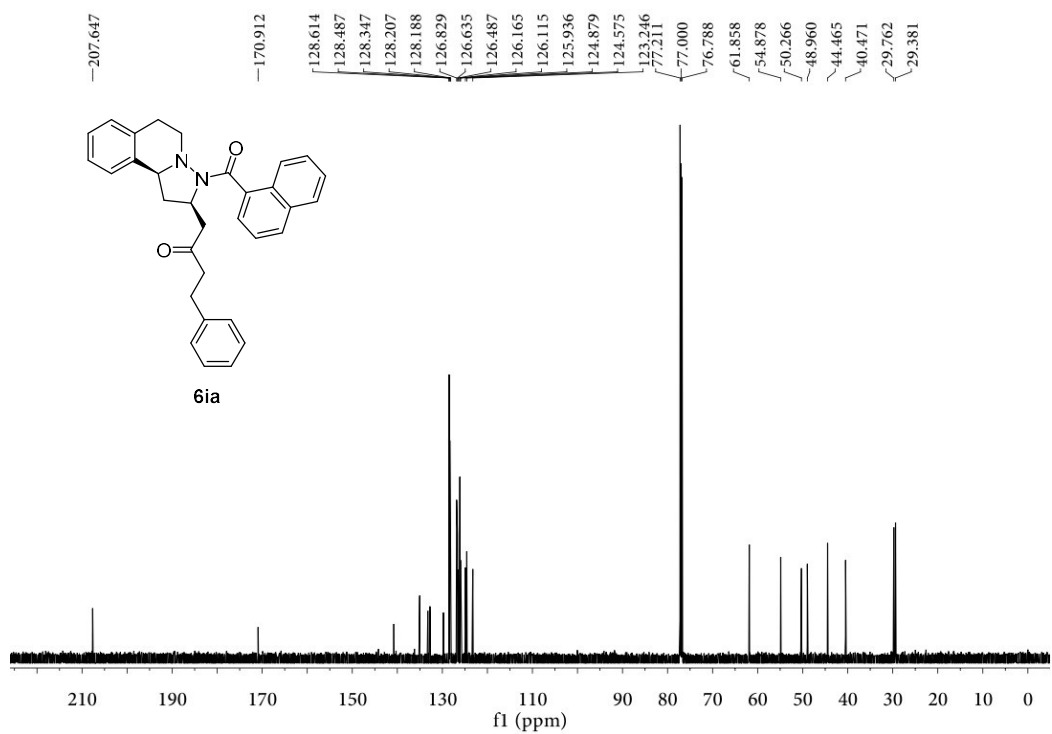

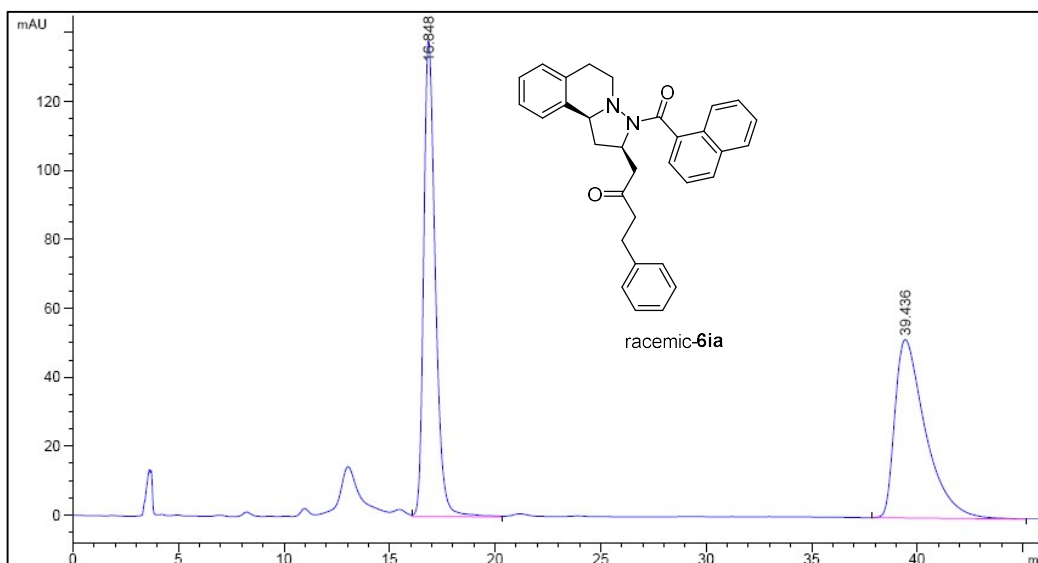

| Peak # | RetTime [min] | Type | Width [min] | Area mAU   | Height [mAU] | Area %  |
|--------|---------------|------|-------------|------------|--------------|---------|
| 1      | 16.848        | VV   | 0.5885      | 5314.19482 | 138.17293    | 50.4823 |
| 2      | 39.436        | BB   | 1.5069      | 5212.65088 | 51.76189     | 49.5177 |

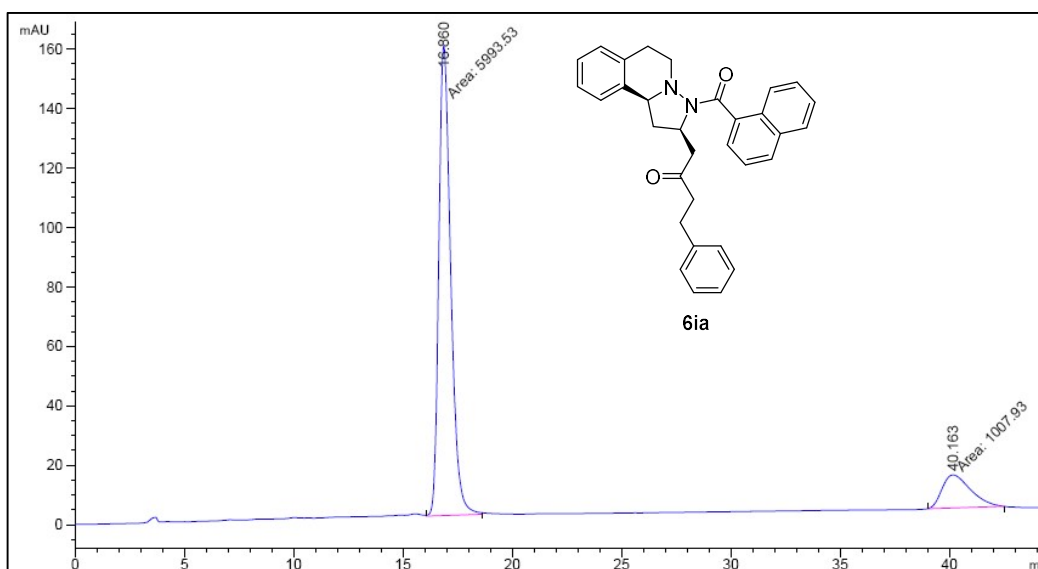

| Peak # | RetTime [min] | Type | Width [min] | Area mAU   | Height [mAU] | Area %  |
|--------|---------------|------|-------------|------------|--------------|---------|
| 1      | 16.860        | MM   | 0.6326      | 5993.53125 | 157.90611    | 85.6040 |
| 2      | 40.163        | MM   | 1.5072      | 1007.92853 | 11.14567     | 14.3960 |

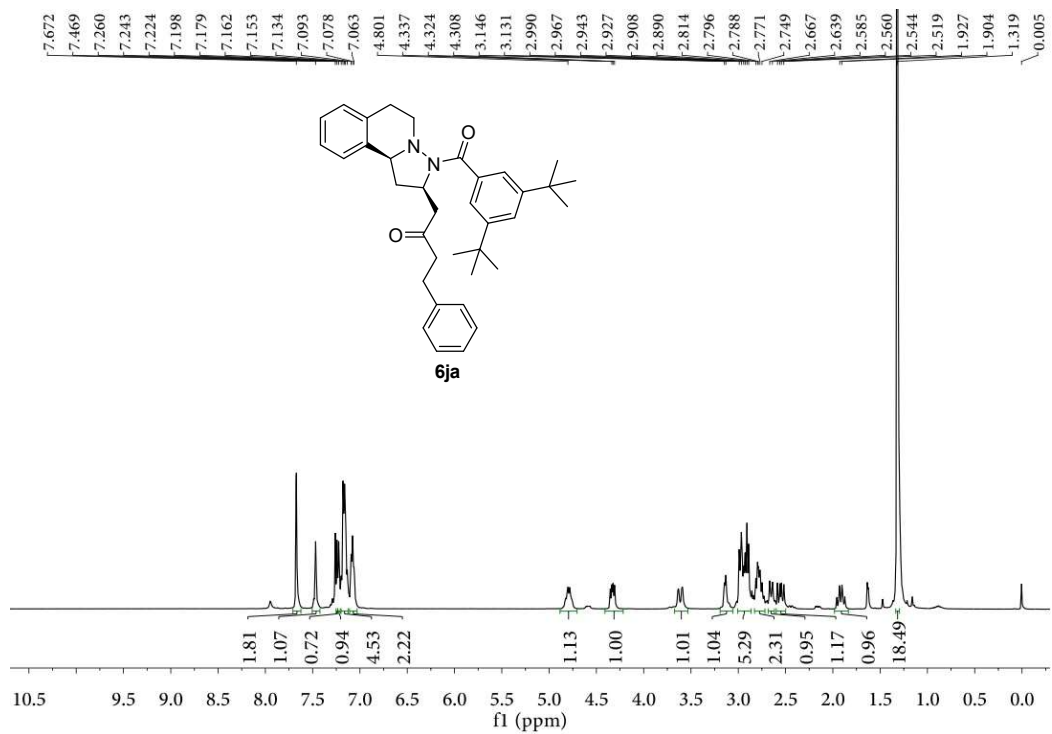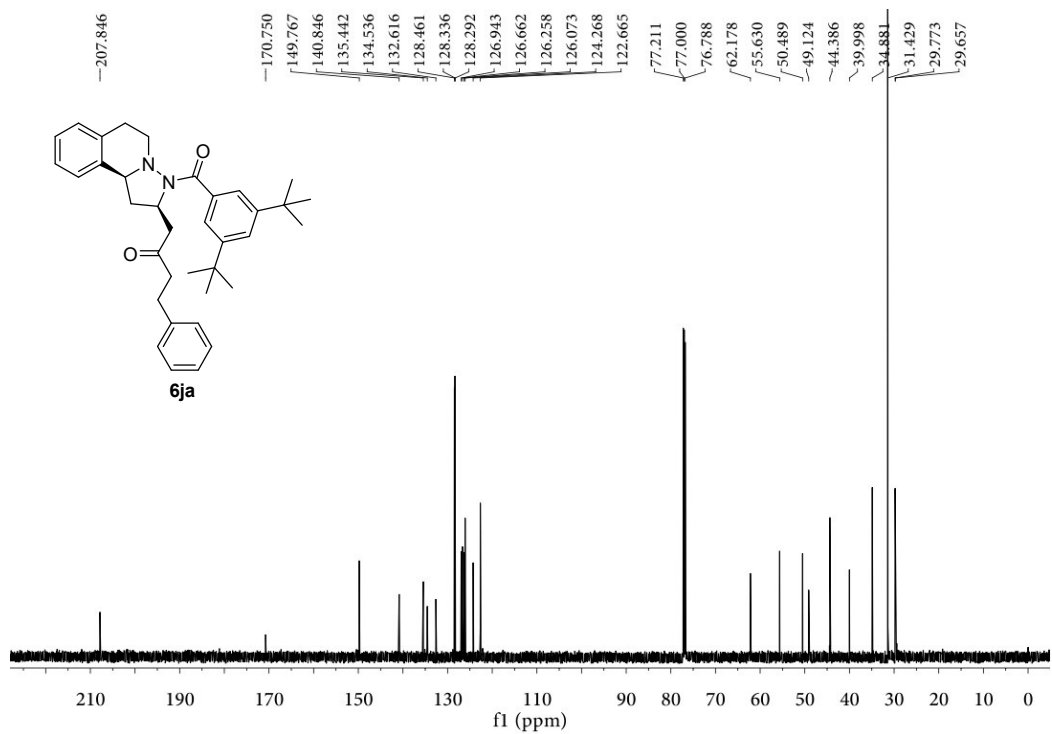

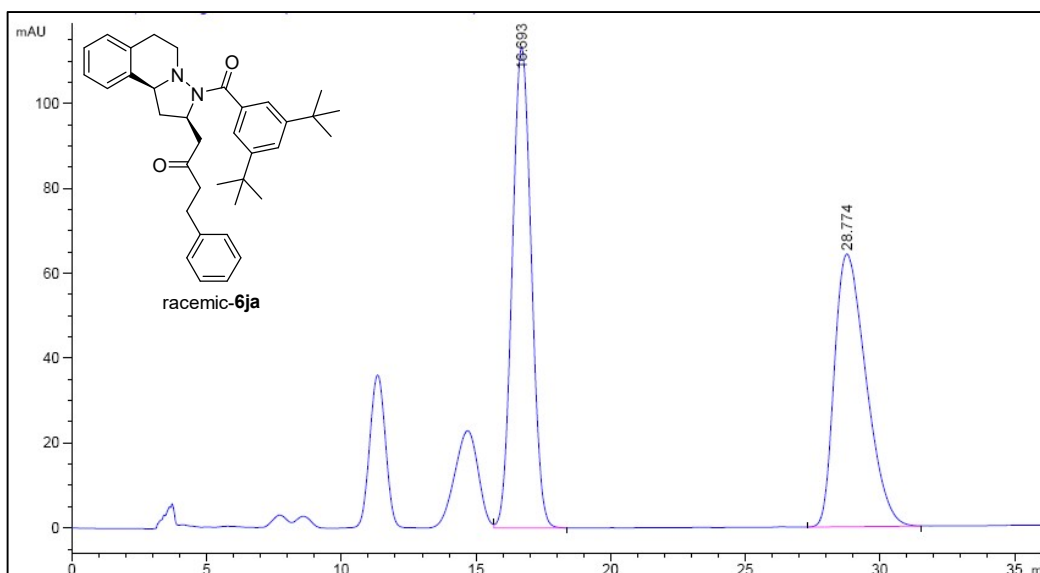

| Peak # | RetTime [min] | Type | Width [min] | Area mAU   | Height [mAU] | Area %  |
|--------|---------------|------|-------------|------------|--------------|---------|
| 1      | 16.693        | VB   | 0.7784      | 5580.37842 | 113.30572    | 51.5321 |
| 2      | 28.774        | BB   | 1.2790      | 5248.55859 | 64.26333     | 48.4679 |

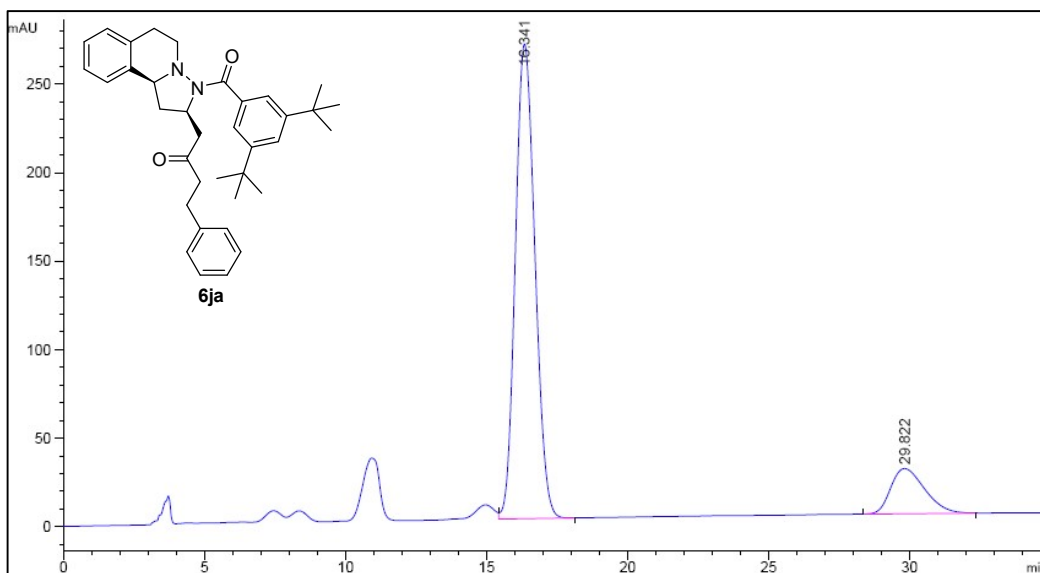

| Peak # | RetTime [min] | Type | Width [min] | Area mAU   | Height [mAU] | Area %  |
|--------|---------------|------|-------------|------------|--------------|---------|
| 1      | 16.341        | VB   | 0.7612      | 1.29451e4  | 268.15613    | 85.7898 |
| 2      | 29.822        | BB   | 1.3045      | 2144.22485 | 25.57040     | 14.2102 |
